# Supplementary material for: Transcriptional Profiles of Skeletal Muscle Associated With Increasing Severity of White Striping in Commercial Broilers
Source: Front Physiol. 2020 Jun 16;11:580. doi: 10.3389/fphys.2020.00580 (PMC7308426; doi:10.3389/fphys.2020.00580)
Supplement: Supplementary file 2 [file Table_2.XLSX]

## Sheet: C1 Moderate_Mild (2)
NCBI Accession	Gene Symbol	Description	Fold change	Molecule types	Cellular component	Biological process	Mild mean	Mild std.dev.	moderate mean	moderate std.dev.
XM_004940923.2	AADAT	Aminoadipate aminotransferase	1.20532	Enzymes	Cytoplasm	2-oxoglutarate metabolic process [GO:0006103]; biosynthetic process [GO:0009058]; glutamate metabolic process [GO:0006536]	990.333	76.3614	1193.67	90.394
XM_015285027.1	ABHD1	Abhydrolase domain containing 1	1.30582	Uncharacterized	Integral component of membrane	cellular lipid metabolic process [GO:0044255]; medium-chain fatty acid biosynthetic process [GO:0051792]; medium-chain fatty acid catabolic process [GO:0051793]	1140.67	78.3471	1489.5	218.408
NM_205092.1	ADH6	Alcohol dehydrogenase 6 (class V)	1.53875	Enzymes	Cytoplasm	Uncharacterized	90.3333	15.5778	139	20.3273
XM_015275782.1	ATXN7L1	Ataxin 7-like 1	-1.26871	Other	Other	Uncharacterized	330.5	17.9304	260.5	31.7789
XM_015289810.1	BIN1	Bridging integrator 1	1.24463	Other	Nucleus	endosome to lysosome transport [GO:0008333]; lipid tube assembly [GO:0060988]; negative regulation of amyloid-beta formation [GO:1902430]; negative regulation of aspartic-type endopeptidase activity involved in amyloid precursor protein catabolic process [GO:1902960]; negative regulation of calcium ion transmembrane transport via high voltage-gated calcium channel [GO:1904878]; negative regulatio…	6285.67	425.382	7823.33	706.402
XM_414603.5	C13H5ORF45	Chromosome 13 open reading frame, human C5orf45	2.10309	Uncharacterized	Uncharacterized	Uncharacterized	64.6667	16.3177	136	41.4295
XM_015283636.1	c1orf95	Chromosome 3 open reading frame, human C1orf95	2.22727	Uncharacterized	Uncharacterized	Uncharacterized	106.333	16.452	236.833	104.649
XM_001232466.4	C1QTNF5	C1q and tumor necrosis factor related protein 5	1.32402	Transmembrane receptor	Plasma membrane	inner ear development [GO:0048839]; protein secretion [GO:0009306]; protein trimerization [GO:0070206]	119.333	12.6912	158	12.0167
NM_205005.1	CALM	Calmodulin 2 (phosphorylase kinase, delta)	-1.30705	Uncharacterized	Calcium channel complex	activation of adenylate cyclase activity [GO:0007190]; cofactor metabolic process [GO:0051186]; detection of calcium ion [GO:0005513]; establishment of protein localization to mitochondrial membrane [GO:0090151]; Fc-epsilon receptor signaling pathway [GO:0038095]; G protein-coupled receptor signaling pathway [GO:0007186]; inositol phosphate metabolic process [GO:0043647]; MAPK cascade [GO:0000165…	157.5	26.0749	120.5	17.0029
XM_001234586.4	CDK7	Cyclin-dependent kinase 7	-1.21074	Kinase	Nucleus	positive regulation of transcription by RNA polymerase II [GO:0045944]; protein phosphorylation [GO:0006468]; protein stabilization [GO:0050821]; transcription by RNA polymerase II [GO:0006366]	1255.33	81.4215	1036.83	48.672
NM_001098539.1	CTTNBP2	Cortactin binding protein 2	-1.29864	Other	Cytoplasm	brain development [GO:0007420]; regulation of modification of postsynaptic actin cytoskeleton [GO:1905274]	191.333	18.6512	147.333	16.4033
XM_015292685.1	DBNDD1	Dysbindin (dystrobrevin binding protein 1) domain containing 1	1.29544	Uncharacterized	Cytoplasm	Uncharacterized	4026.17	864.9	5215.67	236.878
XM_015284573.1	DDO	D-aspartate oxidase	-1.80382	Enzymes	Cytoplasm	aspartate catabolic process [GO:0006533]; aspartate metabolic process [GO:0006531]; D-amino acid catabolic process [GO:0019478]; D-amino acid metabolic process [GO:0046416]; grooming behavior [GO:0007625]; hormone metabolic process [GO:0042445]; insemination [GO:0007320]	2001.33	324.092	1109.5	369.98
XM_424746.5	DIMT1	DIM1 dimethyladenosine transferase 1 homolog (S. cerevisiae)	-1.41322	Enzymes	Cytoplasm	positive regulation of rRNA processing [GO:2000234]; rRNA methylation [GO:0031167]	1271.67	135.32	899.833	56.1655
XM_415570.5	DPP7	Dipeptidyl-peptidase 7	-1.26597	Peptidase	Cytoplasm	neutrophil degranulation [GO:0043312]; proteolysis [GO:0006508]	4352	488.201	3437.67	418.084
XM_001233549.4	dyl2	Dynein light chain 2 cytoplasmic	1.21981	Uncharacterized	Cytoplasm	microtubule-based process [GO:0007017]; positive regulation of ATP-dependent microtubule motor activity, plus-end-directed [GO:2000582]	53.8333	4.75044	65.6667	6.21825
XM_004935873.2	EFR3B	EFR3 homolog B (S. cerevisiae)	1.43646	Other	Plasma membrane	phosphatidylinositol phosphorylation [GO:0046854]; protein localization to plasma membrane [GO:0072659]	30.1667	2.99444	43.3333	7.60701
XM_015274134.1	ELP5	Elongator complex protein 5-like	1.23933	Uncharacterized	Elongator holoenzyme complex	tRNA modification [GO:0006400]; tRNA wobble uridine modification [GO:0002098]	1702	139.91	2109.33	226.173
XM_414188.5	EMC8	ER membrane protein complex subunit 8	-1.38113	Other	Cytoplasm	Uncharacterized	2806	298.049	2031.67	230.685
XM_015297791.1	EVA1B	Eva-1 homolog B (C. elegans)	-2.24441	Other	Other	Uncharacterized	267.833	77.7314	119.333	19.0333
XM_015296498.1	FAM65C	Family with sequence similarity 65, member C	-1.45016	Uncharacterized	Uncharacterized	Uncharacterized	75.1667	11.8898	51.8333	5.67157
XM_015288868.1	FGFBP3	Fibroblast growth factor binding protein 3	1.35681	Other	Extracellular space	cell-cell signaling [GO:0007267]; positive regulation of fibroblast growth factor receptor signaling pathway [GO:0045743]; positive regulation of vascular permeability [GO:0043117]	35.5	4.08656	48.1667	3.43026
XM_015282329.1	FOXP2	Forkhead box P2	-1.3875	Transcription regulator	Nucleus	Uncharacterized	55.5	5.46809	40	3.74166
NM_001001469.1	GART	Phosphoribosylglycinamide formyltransferase, phosphoribosylglycinamide synthetase, phosphoribosylaminoimidazole synthetase	-2.21613	Enzymes	Cytoplasm	'de novo' IMP biosynthetic process [GO:0006189]; adenine biosynthetic process [GO:0046084]; purine nucleotide biosynthetic process [GO:0006164]	1117.67	341.633	504.333	169.254
XM_419481.5	GLO1	Glyoxalase I	-1.21619	Enzymes	Cytoplasm	negative regulation of apoptotic process [GO:0043066]; osteoclast differentiation [GO:0030316]; regulation of transcription by RNA polymerase II [GO:0006357]	26542.3	2023.61	21824.2	1745.1
NM_001282341.1	GLOD4	Glyoxalase domain containing 4	1.25951	Enzymes	Cytoplasm	Uncharacterized	1130.33	95.3806	1423.67	192.712
XM_015275675.1	GOLGA3	Golgin A3	1.21246	Transporter	Cytoplasm	intra-Golgi vesicle-mediated transport [GO:0006891]; spermatogenesis [GO:0007283]	1719.5	184.903	2084.83	126.121
XM_015284817.1	GSTA4	Glutathione S-transferase alpha 4	-2.57692	Uncharacterized	Cytoplasm	glutathione derivative biosynthetic process [GO:1901687]; glutathione metabolic process [GO:0006749]; xenobiotic metabolic process [GO:0006805]	223.333	44.0439	86.6667	20.7043
XM_015289964.1	HEG1	Heart development protein with EGF-like domains 1	-1.41228	Uncharacterized	Mitochondrial inner membrane	translation [GO:0006412]	26.8333	4.26224	19	1.67332
XM_015290317.1	HENMT1	HEN1 methyltransferase homolog 1 (Arabidopsis)	-1.3676	Enzymes	Other	piRNA metabolic process [GO:0034587]; production of siRNA involved in RNA interference [GO:0030422]; RNA methylation [GO:0001510]	130.833	15.2239	95.6667	12.1271
NM_001277716.1	HMBOX1	Homeobox containing 1	1.36627	Transcription regulator	Nucleus	negative regulation of transcription, DNA-templated [GO:0045892]; negative regulation of transcription by RNA polymerase II [GO:0000122]; positive regulation of chromatin binding [GO:0035563]; positive regulation of telomerase activity [GO:0051973]; positive regulation of telomere maintenance via telomerase [GO:0032212]; positive regulation of transcription, DNA-templated [GO:0045893]; regulation…	167	24.5357	228.167	17.6116
XM_015289099.1	IKZF2	IKAROS family zinc finger 2 (Helios)	-1.37447	Uncharacterized	Cytoplasm	positive regulation of transcription by RNA polymerase II [GO:0045944]	380.5	47.0351	276.833	30.8442
XM_015292896.1	IP6K1	Inositol hexakisphosphate kinase 1	1.39486	Kinase	Fibrillar center	inositol phosphate biosynthetic process [GO:0032958]; inositol phosphate metabolic process [GO:0043647]; negative regulation of cold-induced thermogenesis [GO:0120163]; phosphatidylinositol phosphorylation [GO:0046854]	71.3333	8.14043	99.5	9.50263
XM_015276560.1	KIAA1430	KIAA1430	1.67138	Uncharacterized	Uncharacterized	Uncharacterized	47.1667	11.4441	78.8333	17.4518
XM_420707.5	LNX1	Ligand of numb-protein X 1, E3 ubiquitin protein ligase	-1.34444	Enzymes	Cytoplasm	protein homooligomerization [GO:0051260]; ubiquitin-dependent protein catabolic process [GO:0006511]	60.5	7.42294	45	4.14729
XM_015285642.1	LOC100857280	Alcohol dehydrogenase 1-like	1.50965	Uncharacterized	Uncharacterized	Uncharacterized	86.3333	14.8279	130.333	18.6297
XR_001461857.1	LOC100857372	Uncharacterized LOC100857372 (misc_RNA)	1.8294	Uncharacterized	Uncharacterized	Uncharacterized	91.8333	24.3016	168	27.5318
XM_004945862.2	LOC100858951	Phytanoyl-CoA dioxygenase domain-containing protein 1-like	1.27209	Uncharacterized	Uncharacterized	Uncharacterized	547	65.2258	695.833	56.743
XM_015292800.1	LOC100859653	6-phosphofructo-2-kinase/fructose-2,6-biphosphatase 4-like	1.24899	Uncharacterized	Uncharacterized	Uncharacterized	534.833	53.8718	668	47.3371
XR_001469135.1	LOC101749583	Uncharacterized LOC101749583 (ncRNA)	1.44406	Uncharacterized	Uncharacterized	Uncharacterized	47.6667	4.32049	68.8333	10.4195
XM_015273293.1	LOC101750329	Zinc finger protein 251-like	1.60311	Uncharacterized	Uncharacterized	Uncharacterized	118	22.9172	189.167	18.7127
XM_015273372.1	LOC107049106	Uncharacterized LOC107049106	1.56038	Uncharacterized	Uncharacterized	Uncharacterized	625.167	114.388	975.5	75.5956
XM_015273235.1	LOC107049528	Uncharacterized LOC107049528	1.63279	Uncharacterized	Uncharacterized	Uncharacterized	606.833	112.658	990.833	91.2982
XR_001462085.1	LOC107049728	Uncharacterized LOC107049728 (ncRNA)	1.3807	Uncharacterized	Uncharacterized	Uncharacterized	767	73.7428	1059	132.02
XM_015273660.1	LOC107049864	Peptide YY-like	1.33279	Uncharacterized	Uncharacterized	Uncharacterized	102.667	18.9174	136.833	9.1086
XM_015274207.1	LOC107050448	Chromodomain-helicase-DNA-binding protein 3-like	1.34889	Uncharacterized	Uncharacterized	Uncharacterized	67.8333	5.81091	91.5	18.3276
XR_001462642.1	LOC107050527	Uncharacterized LOC107050527 (ncRNA)	1.42819	Uncharacterized	Uncharacterized	Uncharacterized	186.833	11.8561	266.833	34.435
XR_001463114.1	LOC107051421	Uncharacterized LOC107051421 (ncRNA)	1.46067	Uncharacterized	Uncharacterized	Uncharacterized	692.833	66.7395	1012	135.772
XM_015278965.1	LOC107052136	Lysyl oxidase homolog 1-like	1.37699	Uncharacterized	Uncharacterized	Uncharacterized	94.1667	16.558	129.667	15.5649
XR_001465930.1	LOC107053023	Uncharacterized LOC107053023 (ncRNA)	1.32751	Uncharacterized	Uncharacterized	Uncharacterized	38.1667	5.11534	50.6667	5.95539
XM_015301556.1	LOC107056520	Uncharacterized LOC107056520	1.76896	Uncharacterized	Uncharacterized	Uncharacterized	94.5	24.1557	167.167	17.9935
XM_015302318.1	LOC107057290	Nucleolin-like	-3.25558	Uncharacterized	Uncharacterized	Uncharacterized	1872.5	1253.6	575.167	155.296
XM_015302510.1	LOC107057437	Peripheral-type benzodiazepine receptor-associated protein 1-like	1.39909	Uncharacterized	Uncharacterized	Uncharacterized	730	73.4003	1021.33	146.829
XM_015298935.1	LOC419035	FERM domain-containing protein 4A-like	-1.22777	Uncharacterized	Uncharacterized	Uncharacterized	619	55.3173	504.167	60.6611
XM_015299787.1	LOC769223	Complexin-3-like	1.64537	Uncharacterized	SNARE complex	regulation of neurotransmitter secretion [GO:0046928]; synaptic vesicle exocytosis [GO:0016079]	3104.17	727.177	5107.5	1217.7
XM_001232406.3	Mettl21ep	Methyltransferase like 21E (pseudogene)	-2.62981	Other	Other	Uncharacterized	364.667	139.857	138.667	75.4047
XM_004945374.2	MGRN1	Mahogunin, ring finger 1	1.26463	Enzymes	Cytoplasm	endosome to lysosome transport [GO:0008333]; negative regulation of cAMP-mediated signaling [GO:0043951]; negative regulation of G protein-coupled receptor signaling pathway [GO:0045744]; negative regulation of smoothened signaling pathway [GO:0045879]; protein monoubiquitination [GO:0006513]; protein polyubiquitination [GO:0000209]	125.333	7.86554	158.5	25.6652
NM_001037176.1	MORF4L1	Mortality factor 4 like 1	-1.25318	Other	Other	cell proliferation [GO:0008283]; chromatin silencing [GO:0006342]; double-strand break repair via homologous recombination [GO:0000724]; histone acetylation [GO:0016573]; histone deacetylation [GO:0016575]; histone H2A acetylation [GO:0043968]; histone H4 acetylation [GO:0043967]; regulation of growth [GO:0040008]	4943.17	692.487	3944.5	272.462
XM_417403.4	mtg2	Mitochondrial ribosome-associated GTPase 2	-1.3556	Enzymes	Cytoplasm	regulation of mitochondrial translation [GO:0070129]; regulation of respiratory system process [GO:0044065]	585.167	110.886	431.667	21.7041
NM_001079764.2	mto1	Mitochondrial tRNA translation optimization 1	-1.24106	Enzymes	Cytoplasm	mitochondrial tRNA wobble uridine modification [GO:0070899]; tRNA methylation [GO:0030488]; tRNA wobble uridine modification [GO:0002098]	1406.33	129.863	1133.17	69.159
NM_001079483.1	MTX3	Metaxin 3	-1.33502	Other	Mitochondrial sorting and assembly machinery complex	Uncharacterized	263.667	25.0573	197.5	14.8425
XM_015275510.1	MVK	Mevalonate kinase	1.24082	Kinase	Cytoplasm	cholesterol biosynthetic process [GO:0006695]; isopentenyl diphosphate biosynthetic process, mevalonate pathway [GO:0019287]; negative regulation of inflammatory response [GO:0050728]	1801.5	120.095	2235.33	158.765
XM_004939656.2	NEDD9	Neural precursor cell expressed, developmentally down-regulated 9	-1.264	Other	Plasma membrane	actin filament bundle assembly [GO:0051017]; actin filament reorganization [GO:0090527]; cell adhesion [GO:0007155]; cell cycle [GO:0007049]; cell division [GO:0051301]; cell migration [GO:0016477]; cytoskeleton organization [GO:0007010]; integrin-mediated signaling pathway [GO:0007229]; positive regulation of cell migration [GO:0030335]; positive regulation of protein tyrosine kinase activity [G…	237	35.361	187.5	21.8426
NM_001257298.1	NUDT3	Nudix (nucleoside diphosphate linked moiety X)-type motif 3	-1.36527	Phosphatase	Cytoplasm	adenosine 5'-(hexahydrogen pentaphosphate) catabolic process [GO:1901911]; diadenosine hexaphosphate catabolic process [GO:1901909]; diadenosine pentaphosphate catabolic process [GO:1901907]; diphosphoinositol polyphosphate catabolic process [GO:0071544]; diphosphoinositol polyphosphate metabolic process [GO:0071543]	114	15.7353	83.5	9.13783
XM_015286289.1	NUP160	Nucleoporin 160kDa	1.2071	Uncharacterized	Nuclear envelope	export from nucleus [GO:0006406]; viral process [GO:0016032]	404	18.3085	487.667	41.7357
XM_015278294.1	NXT2	Nuclear transport factor 2-like export factor 2	-1.24081	Uncharacterized	Cytoplasm	transport [GO:0051028]; nucleocytoplasmic transport [GO:0006913]; protein import into nucleus [GO:0006606]	315.167	19.4876	254	26.0384
XM_015293317.1	P4HTM	Prolyl 4-hydroxylase, transmembrane (endoplasmic reticulum)	1.62589	Enzymes	Cytoplasm	peptidyl-proline hydroxylation to 4-hydroxy-L-proline [GO:0018401]; regulation of erythrocyte differentiation [GO:0045646]	234.333	31.7406	381	67.1506
XM_004947316.2	PER3	Period homolog 3 (Drosophila)	2.01957	Other	Nucleus	circadian regulation of gene expression [GO:0032922]; entrainment of circadian clock by photoperiod [GO:0043153]; negative regulation of transcription by RNA polymerase II [GO:0000122]; protein stabilization [GO:0050821]; regulation of circadian sleep/wake cycle, sleep [GO:0045187]; response to light stimulus [GO:0009416]	187.333	53.6458	378.333	105.217
XM_015281564.1	PFKP	Phosphofructokinase, platelet	1.21132	Uncharacterized	Cytoplasm	fructose 6-phosphate metabolic process [GO:0006002]	963	61.2209	1166.5	159.219
XM_015286275.1	PLCB2	Phospholipase C, beta 2	1.32407	Enzymes	Cytoplasm	activation of phospholipase C activity [GO:0007202]; G protein-coupled receptor signaling pathway [GO:0007186]; inositol phosphate metabolic process [GO:0043647]; intracellular signal transduction [GO:0035556]; lipid catabolic process [GO:0016042]; phospholipid metabolic process [GO:0006644]; sensory perception of bitter taste [GO:0050913]; Wnt signaling pathway, calcium modulating pathway [GO:00…	18	1.41421	23.8333	4.70815
NM_204697.2	POPDC3	Popeye domain containing 3	-1.21109	Other	Integral component of membrane	heart development [GO:0007507]; regulation of membrane potential [GO:0042391]; skeletal muscle tissue development [GO:0007519]	10177	702.058	8403.17	730.242
XM_004945052.2	PPP2R2B	Protein phosphatase 2, regulatory subunit B, beta	-1.20449	Phosphatase	Cytoplasm	Uncharacterized	322	27.2837	267.333	19.0333
NM_001177575.1	PTH1R	Parathyroid hormone 1 receptor	1.43333	G-protein containing receptor	Plasma membrane	adenylate cyclase-activating G protein-coupled receptor signaling pathway [GO:0007189]; bone mineralization [GO:0030282]; bone resorption [GO:0045453]; cell maturation [GO:0048469]; cell surface receptor signaling pathway [GO:0007166]; cellular calcium ion homeostasis [GO:0006874]; chondrocyte differentiation [GO:0002062]; negative regulation of cell proliferation [GO:0008285]; osteoblast develop…	80	9.42338	114.667	21.3229
XM_419514.5	RMDN2	Regulator of microtubule dynamics 2	-1.33485	Other	Cytoplasm	Uncharacterized	588.667	69.5116	441	77.5706
XR_001469367.1	SLC26A11	Solute carrier family 26 (anion exchanger), member 11 (misc_RNA)	1.52167	Uncharacterized	Endoplasmic reticulum	ion transport [GO:0006811]; sulfate transport [GO:0008272]	103.833	11.1609	158	22.3786
NM_204716.1	SLC6A2	Solute carrier family 6 (neurotransmitter transporter, noradrenalin), member 2	-1.38689	Transporter	Plasma membrane	positive regulation of peptide hormone secretion [GO:0090277]	70.5	8.21584	50.8333	5.56477
XM_001231468.4	SPA17	Sperm autoantigenic protein 17	1.38131	Uncharacterized	Cytoplasm	binding of sperm to zona pellucida [GO:0007339]; epithelial cilium movement [GO:0003351]; single fertilization [GO:0007338]; spermatogenesis [GO:0007283]	914.833	86.5527	1263.67	185.317
NM_001031061.1	SPAST	Spastin	-1.50368	Enzymes	Nucleus	anterograde axonal transport [GO:0008089]; axonal transport of mitochondrion [GO:0019896]; axonogenesis [GO:0007409]; cytokinetic process [GO:0032506]; cytoplasmic microtubule organization [GO:0031122]; ER to Golgi vesicle-mediated transport [GO:0006888]; exit from mitosis [GO:0010458]; membrane fission [GO:0090148]; microtubule bundle formation [GO:0001578]; microtubule severing [GO:0051013]; mi…	374.667	66.4098	249.167	17.4518
XM_015283824.1	SRBD1	S1 RNA binding domain 1	-1.24016	Uncharacterized	Other	nucleobase-containing compound metabolic process [GO:0006139]; translation [GO:0006412]	5696.67	370.735	4593.5	548.962
XM_004941189.2	STAP1	Signal transducing adaptor family member 1	-1.52295	Other	Cytoplasm	cellular response to lipopolysaccharide [GO:0071222]; negative regulation of macrophage chemotaxis [GO:0010760]; negative regulation of macrophage colony-stimulating factor signaling pathway [GO:1902227]; negative regulation of microglial cell migration [GO:1904140]; negative regulation of phosphorylation [GO:0042326]; negative regulation of ruffle assembly [GO:1900028]; positive regulation of ac…	182.5	15.8209	119.833	9.36839
XM_015289690.1	STK39	Serine/threonine kinase 39	1.49371	Kinase	Nucleus	activation of MAPK activity [GO:0000187]; activation of protein kinase activity [GO:0032147]; cellular hypotonic response [GO:0071476]; cellular response to chemokine [GO:1990869]; chemokine (C-X-C motif) ligand 12 signaling pathway [GO:0038146]; intracellular signal transduction [GO:0035556]; ion homeostasis [GO:0050801]; maintenance of lens transparency [GO:0036438]; negative regulation of crea…	212	53.0283	316.667	73.0525
XM_015284622.1	SYNCRIP	Synaptotagmin binding, cytoplasmic RNA interacting protein	-1.24154	Uncharacterized	Endoplasmic reticulum complex	cellular response to interferon-gamma [GO:0071346]; CRD-mediated stabilization [GO:0070934]; splicing, via spliceosome [GO:0000398]; negative regulation of translation [GO:0017148]; osteoblast differentiation [GO:0001649]; RNA processing [GO:0006396]; RNA splicing [GO:0008380]; viral process [GO:0016032]	2598.33	128.453	2092.83	290.113
XM_015282717.1	TBC1D30	TBC1 domain family, member 30	-1.74618	Other	Cytoplasm	activation of GTPase activity [GO:0090630]; intracellular protein transport [GO:0006886]; negative regulation of cilium assembly [GO:1902018]; positive regulation of GTPase activity [GO:0043547]	95.1667	37.0697	54.5	9.56556
NM_001277894.1	TMEM138	Transmembrane protein 138	1.25945	Other	Extracellular space	cilium assembly [GO:0060271]	595.5	45.3464	750	153.176
XM_015290038.1	TMEM177	Transmembrane protein 177	-1.3304	Uncharacterized	Integral component of mitochondrial inner membrane	Uncharacterized	855.667	149.786	643.167	43.407
XM_015283873.1	TMEM206	Transmembrane protein 206	-1.23413	Uncharacterized	Integral component of membrane	Uncharacterized	362.833	18.1925	294	21.2226
XM_004942040.2	TYSND1	Trypsin domain containing 1	1.2958	Peptidase	Cytoplasm	protein homooligomerization [GO:0051260]; protein processing [GO:0016485]; protein targeting to peroxisome [GO:0006625]; proteolysis [GO:0006508]; regulation of fatty acid beta-oxidation [GO:0031998]	1983.33	155.716	2570	467.683
XM_015283002.1	UBR5	Ubiquitin protein ligase E3 component n-recognin 5	-1.24294	Uncharacterized	Perinuclear region of cytoplasm	cell proliferation [GO:0008283]; cellular response to DNA damage stimulus [GO:0006974]; DNA repair [GO:0006281]; negative regulation of double-strand break repair [GO:2000780]; negative regulation of histone H2A K63-linked ubiquitination [GO:1901315]; positive regulation of canonical Wnt signaling pathway [GO:0090263]; positive regulation of gene expression [GO:0010628]; positive regulation of pr…	484.333	30.3688	389.667	54.7564
XM_003640479.3	URB1	URB1 ribosome biogenesis 1 homolog (S. cerevisiae)	-1.30366	Uncharacterized	Fibrillar center	maturation of 5.8S rRNA from tricistronic rRNA transcript (SSU-rRNA, 5.8S rRNA, LSU-rRNA) [GO:0000466]; maturation of LSU-rRNA from tricistronic rRNA transcript (SSU-rRNA, 5.8S rRNA, LSU-rRNA) [GO:0000463]	522.333	79.3641	400.667	34.0686
NM_205046.1	XCL1	Lymphotactin	-1.43672	Uncharacterized	Extracellular space	cellular response to interferon-gamma [GO:0071346]; cellular response to interleukin-1 [GO:0071347]; cellular response to tumor necrosis factor [GO:0071356]; chemokine-mediated signaling pathway [GO:0070098]; G protein-coupled receptor signaling pathway [GO:0007186]; inflammatory response [GO:0006954]; lymphocyte chemotaxis [GO:0048247]; monocyte chemotaxis [GO:0002548]; neutrophil chemotaxis [GO…	134.333	8.26236	93.5	19.1076
XR_001468310.1	ZWILCH	Zwilch kinetochore protein (misc_RNA)	1.43613	Uncharacterized	Cytoplasm	cell division [GO:0051301]; mitotic cell cycle checkpoint [GO:0007093]	541.5	75.5639	777.667	141.993

## Sheet: C2 Severe_Moderate (2)
NCBI Accession	Gene Symbol	Description	Fold change	Type	Cellular component	Biological process	moderate mean	moderate std.dev.	Severe mean	Severe std.dev.
XM_421005.5	ABCC8	ATP-binding cassette, sub-family C (CFTR/MRP), member 8	-1.44496	Transporter	Plasma membrane	cellular glucose homeostasis [GO:0001678]; cellular response to organic substance [GO:0071310]; female pregnancy [GO:0007565]; memory [GO:0007613]; negative regulation of angiogenesis [GO:0016525]; negative regulation of glial cell proliferation [GO:0060253]; negative regulation of insulin secretion [GO:0046676]; negative regulation of low-density lipoprotein particle clearance [GO:0010989]; nega…	1089.5	160.45	754	90.7304
XM_015290280.1	ACBD6	Acyl-CoA binding domain containing 6	1.5283	Other	Cytoplasm	acyl-CoA metabolic process [GO:0006637]	44.1667	8.06019	67.5	12.7932
XM_015286053.1	ALMS1	Alstrom syndrome 1	-1.38138	Other	Cytoplasm	ciliary basal body-plasma membrane docking [GO:0097711]; endosomal transport [GO:0016197]; G2/M transition of mitotic cell cycle [GO:0000086]; positive regulation of cold-induced thermogenesis [GO:0120162]; regulation of G2/M transition of mitotic cell cycle [GO:0010389]; regulation of stress fiber assembly [GO:0051492]	38.3333	2.65832	27.75	5.90903
XM_015277433.1	AQP7	Aquaporin 7	1.53151	Transporter	Plasma membrane	excretion [GO:0007588]; generation of precursor metabolites and energy [GO:0006091]; glycerol transport [GO:0015793]; water transport [GO:0006833]	587.167	108.334	899.25	59.2699
XM_015291468.1	armc9	Armadillo repeat containing 9	-1.61815	Uncharacterized	Cytoplasm	cilium assembly [GO:0060271]	86.1667	10.6474	53.25	10.9659
XM_015292043.1	ARNT2	Aryl-hydrocarbon receptor nuclear translocator 2	-1.31825	Transcription regulator	Nucleus	lipid A biosynthetic process [GO:0009245]; lipopolysaccharide biosynthetic process [GO:0009103]; protein O-linked glycosylation [GO:0006493]	233	26.2069	176.75	19.9562
XM_015284793.1	ASRGL1	Asparaginase like 1	1.49261	Enzyme	Cytoplasm	asparagine catabolic process via L-aspartate [GO:0033345]; protein maturation [GO:0051604]	33.8333	4.83391	50.5	7.54983
NM_001030801.2	ATP6AP2	ATPase, H+ transporting, lysosomal accessory protein 2	-1.3489	Transporter	Cytoplasm	angiotensin maturation [GO:0002003]; eye pigmentation [GO:0048069]; head morphogenesis [GO:0060323]; positive regulation of transforming growth factor beta1 production [GO:0032914]; positive regulation of Wnt signaling pathway [GO:0030177]; regulation of MAPK cascade [GO:0043408]; rostrocaudal neural tube patterning [GO:0021903]	4968.33	1005.67	3683.25	547.227
XM_015294421.1	ATPAF2	ATP synthase mitochondrial F1 complex assembly factor 2	1.348	Other	Cytoplasm	proton-transporting ATP synthase complex assembly [GO:0043461]	2717.17	196.266	3662.75	490.526
XM_422275.4	BRINP2	Bone morphogenetic protein/retinoic acid inducible neural-specific 2	1.40581	Other	Cytoplasm	cell cycle arrest [GO:0007050]; cellular response to retinoic acid [GO:0071300]; negative regulation of mitotic cell cycle [GO:0045930]; positive regulation of neuron differentiation [GO:0045666]	71.6667	15.6418	100.75	12.9454
NM_205005.1	CALM	Calmodulin 2 (phosphorylase kinase, delta)	1.25104	Uncharacterized	Calcium channel complex	activation of adenylate cyclase activity [GO:0007190]; cofactor metabolic process [GO:0051186]; detection of calcium ion [GO:0005513]; establishment of protein localization to mitochondrial membrane [GO:0090151]; Fc-epsilon receptor signaling pathway [GO:0038095]; G protein-coupled receptor signaling pathway [GO:0007186]; inositol phosphate metabolic process [GO:0043647]; MAPK cascade [GO:0000165…	120.5	17.0029	150.75	13.4009
XM_015295594.1	CBX8	Chromobox homolog 8	-1.28938	Other	Nucleus	cellular response to hydrogen peroxide [GO:0070301]; histone ubiquitination [GO:0016574]; negative regulation of transcription by RNA polymerase II [GO:0000122]; positive regulation of cell proliferation [GO:0008284]; positive regulation of collagen biosynthetic process [GO:0032967]; positive regulation of DNA repair [GO:0045739]	205.333	11.3431	159.25	17.1925
XM_424681.5	CCDC124	Coiled-coil domain containing 124	1.58054	Other	Other	cell cycle [GO:0007049]; cell division [GO:0051301]	1421.67	292.431	2247	295.467
XR_001465402.1	CHCHD7	Coiled-coil-helix-coiled-coil-helix domain containing 7	1.28878	Other	Cytoplasm	Uncharacterized	4587.67	404.502	5912.5	658.309
XM_015297051.1	CHD5	Chromodomain helicase DNA binding protein 5	1.3767	Enzyme	Nucleus	cerebral cortex neuron differentiation [GO:0021895]; histone H3-K27 trimethylation [GO:0098532]; histone H4 acetylation [GO:0043967]; negative regulation of cell proliferation [GO:0008285]; positive regulation of signal transduction by p53 class mediator [GO:1901798]; regulation of transcription involved in cell fate commitment [GO:0060850]; spermatogenesis, exchange of chromosomal proteins [GO:0…	882	245.827	1214.25	103.934
NM_205121.1	CHST3	Carbohydrate (chondroitin 6) sulfotransferase 3	1.53561	Enzyme	Cytoplasm	carbohydrate metabolic process [GO:0005975]; chondroitin sulfate biosynthetic process [GO:0030206]; N-acetylglucosamine metabolic process [GO:0006044]; sulfur compound metabolic process [GO:0006790]	56.1667	7.52108	86.25	18.6436
XM_001233980.4	COMMD2	COMM domain containing 2	-1.20708	Other	Other	Uncharacterized	591.167	24.9433	489.75	42.3113
XM_004935926.2	CYP39A1	Cytochrome P450, family 39, subfamily A, polypeptide 1	1.41889	Enzyme	Cytoplasm	bile acid biosynthetic process [GO:0006699]; bile acid catabolic process [GO:0030573]; cholesterol catabolic process [GO:0006707]; cholesterol homeostasis [GO:0042632]; digestion [GO:0007586]; sterol metabolic process [GO:0016125]	638	104.629	905.25	69.4376
XM_417859.5	DCPS	Decapping enzyme, scavenger	1.23052	Enzyme	Nucleus	cellular response to menadione [GO:0036245]; deadenylation-dependent decapping of nuclear-transcribed [GO:0000290]; exonucleolytic nuclear-transcribed catabolic process involved in deadenylation-dependent decay [GO:0043928]; cis splicing, via spliceosome [GO:0045292]; negative regulation of programmed cell death [GO:0043069]; nuclear-transcribed catabolic process, deadenylation-dependent decay [G…	1351.67	34.3434	1663.25	194.916
XM_424746.5	DIMT1	DIM1 dimethyladenosine transferase 1 homolog (S. cerevisiae)	1.32219	Enzyme	Cytoplasm	positive regulation of rRNA processing [GO:2000234]; rRNA methylation [GO:0031167]	899.833	56.1655	1189.75	97.5649
XM_003641653.3	DNM3	Dynamin 3	1.40344	Enzyme	Cytoplasm	endocytosis [GO:0006897]; filopodium assembly [GO:0046847]; negative regulation of dendritic spine morphogenesis [GO:0061002]; positive regulation of filopodium assembly [GO:0051491]; positive regulation of synaptic vesicle recycling [GO:1903423]; postsynaptic neurotransmitter receptor internalization [GO:0098884]; receptor internalization [GO:0031623]; regulation of synapse structure or activity…	266.667	14.3341	374.25	45.5951
XM_015291527.1	EPHB3	EPH receptor B3	1.52409	Kinase	Plasma membrane	angiogenesis [GO:0001525]; axonal fasciculation [GO:0007413]; axon guidance [GO:0007411]; cell differentiation [GO:0030154]; cell migration [GO:0016477]; central nervous system projection neuron axonogenesis [GO:0021952]; corpus callosum development [GO:0022038]; dendritic spine development [GO:0060996]; dendritic spine morphogenesis [GO:0060997]; digestive tract morphogenesis [GO:0048546]; ephri…	591.5	89.6298	901.5	176.417
XM_015295517.1	EPN3	Epsin 3	1.34714	Other	Cytoplasm	Uncharacterized	50503.8	4607.44	68035.5	3718.23
XM_416405.5	EPS8	Epidermal growth factor receptor pathway substrate 8	-1.26199	Peptidase	Plasma membrane	actin crosslink formation [GO:0051764]; actin cytoskeleton reorganization [GO:0031532]; actin filament bundle assembly [GO:0051017]; actin polymerization-dependent cell motility [GO:0070358]; adult locomotory behavior [GO:0008344]; barbed-end actin filament capping [GO:0051016]; behavioral response to ethanol [GO:0048149]; cell proliferation [GO:0008283]; cellular response to leukemia inhibitory …	934.5	63.824	740.5	59.5903
NM_204239.2	ERAL1	Era-like 12S mitochondrial rRNA chaperone 1	1.47311	Other	Cytoplasm	ribosomal small subunit assembly [GO:0000028]	734.5	53.7615	1082	115.943
XM_015297791.1	EVA1B	Eva-1 homolog B (C. elegans)	1.9567	Other	Other	Uncharacterized	119.333	19.0333	233.5	46.9361
XM_414950.5	FAM234A	Uncharacterized protein	-1.39966	Other	Plasma membrane	Uncharacterized	4969.83	404.166	3550.75	578.741
XM_015276000.1	FARS2	Phenylalanyl-tRNA synthetase 2, mitochondrial	1.36689	Enzyme	Cytoplasm	phenylalanyl-tRNA aminoacylation [GO:0006432]; tRNA aminoacylation for protein translation [GO:0006418]; tRNA processing [GO:0008033]	125.833	13.7028	172	35.6371
XM_015291408.1	FYTTD1	Forty-two-three domain containing 1	1.30078	Other	Nucleus	export from nucleus [GO:0006406]	42.6667	3.20416	55.5	3.87298
XM_015297726.1	GMEB1	Glucocorticoid modulatory element binding protein 1	1.39642	Transcription regulator	Nucleus	regulation of transcription by RNA polymerase II [GO:0006357]	43160.5	2603.34	60270.2	5417.88
XM_004934328.2	GSC2	Goosecoid homeobox 2	1.53809	Transcription regulator	Nucleus	(1->3)-beta-D-glucan biosynthetic process [GO:0006075]; ascospore wall assembly [GO:0030476]; regulation of cell shape [GO:0008360]	223.167	43.1157	343.25	48.4862
NM_001031076.1	GTF3C6	General transcription factor IIIC, polypeptide 6, alpha 35kDa	1.38229	Transcription regulator	Nucleus	5S class rRNA transcription by RNA polymerase III [GO:0042791]; transcription by RNA polymerase III [GO:0006383]; tRNA transcription by RNA polymerase III [GO:0042797]	1771.33	174.524	2448.5	188.13
XM_015280096.1	HAUS6	HAUS augmin-like complex, subunit 6	-1.39013	Other	Cytoplasm	cell division [GO:0051301]; centrosome cycle [GO:0007098]; ciliary basal body-plasma membrane docking [GO:0097711]; G2/M transition of mitotic cell cycle [GO:0000086]; regulation of G2/M transition of mitotic cell cycle [GO:0010389]; spindle assembly [GO:0051225]	546.667	66.7673	393.25	48.2174
XM_015288164.1	KCNMA1	Potassium large conductance calcium-activated channel, subfamily M, alpha member 1	1.52885	Ion channel	Plasma membrane	regulation of ion transmembrane transport [GO:0034765]; regulation of membrane potential [GO:0042391]	26	2.28035	39.75	3.5
NM_001031328.1	KIAA0907	KIAA0907	1.4993	Other	Nucleus	Uncharacterized	17374.7	1622.42	26049.8	2849.95
XM_015280905.1	LAMTOR1	Late endosomal/lysosomal adaptor, MAPK and MTOR activator 1	1.21231	Other	Plasma membrane	cell cycle arrest [GO:0007050]; cellular protein localization [GO:0034613]; cellular response to amino acid stimulus [GO:0071230]; cholesterol homeostasis [GO:0042632]; endosomal transport [GO:0016197]; endosome organization [GO:0007032]; lysosome localization [GO:0032418]; lysosome organization [GO:0007040]; neutrophil degranulation [GO:0043312]; positive regulation of MAPK cascade [GO:0043410];…	8600.5	332.729	10426.5	566.329
XM_015302264.1	LOC100857331	Tapasin-related protein-like	1.38847	Uncharacterized	Uncharacterized	Uncharacterized	513.333	88.3033	712.75	63.2528
XM_015272964.1	LOC100858284	Golgi phosphoprotein 3-like	1.26078	Uncharacterized	Uncharacterized	Uncharacterized	77.3333	4.32049	97.5	10.3441
XM_004945862.2	LOC100858951	Phytanoyl-CoA dioxygenase domain-containing protein 1-like	-1.26573	Uncharacterized	Uncharacterized	Uncharacterized	695.833	56.743	549.75	29.8817
XR_001465534.1	LOC101748087	Uncharacterized LOC101748087 (ncRNA)	1.58429	Uncharacterized	Uncharacterized	Uncharacterized	115.667	15.8198	183.25	18.4097
XR_001464393.1	LOC101749321	Uncharacterized LOC101749321 (ncRNA)	1.30675	Uncharacterized	Uncharacterized	Uncharacterized	244.5	47.4584	319.5	18.7172
XR_001466263.1	LOC101749696	Uncharacterized LOC101749696 (misc_RNA)	1.69457	Uncharacterized	Uncharacterized	Uncharacterized	663	107.913	1123.5	157.807
XM_015273644.1	LOC101750014	Uncharacterized LOC101750014	1.30796	Uncharacterized	Uncharacterized	Uncharacterized	605.333	84.6916	791.75	96.2233
XM_015273293.1	LOC101750329	Zinc finger protein 251-like	-1.67775	Uncharacterized	Uncharacterized	Uncharacterized	189.167	18.7127	112.75	38.3612
XM_015298463.1	LOC101750908	T-lymphocyte surface antigen Ly-9-like	1.32911	Uncharacterized	Uncharacterized	Uncharacterized	92.1667	21.9218	122.5	10.8781
XR_001469825.1	LOC101751371	Uncharacterized LOC101751371 (ncRNA)	1.53673	Uncharacterized	Uncharacterized	Uncharacterized	163.333	21.6856	251	40.2741
XM_015273265.1	LOC107049545	Cytochrome c oxidase subunit 5B, mitochondrial	1.93598	Uncharacterized	Uncharacterized	mitochondrial ATP synthesis coupled proton transport [GO:0042776]; mitochondrial electron transport, cytochrome c to oxygen [GO:0006123]	1224.83	185.268	2371.25	707.714
XM_015273425.1	LOC107049670	Uncharacterized LOC107049670	1.50887	Uncharacterized	Uncharacterized	Uncharacterized	338.333	52.6219	510.5	63.2535
XM_015273441.1	LOC107049697	Neuroblast differentiation-associated protein AHNAK-like	1.77465	Uncharacterized	Uncharacterized	Uncharacterized	23.6667	3.01109	42	7.52773
XR_001462580.1	LOC107050415	Uncharacterized LOC107050415 (ncRNA)	1.26272	Uncharacterized	Uncharacterized	Uncharacterized	393	67.6757	496.25	42.9059
XM_015274211.1	LOC107050461	EH domain-containing protein 2-like	1.46098	Uncharacterized	Uncharacterized	Uncharacterized	519	49.3396	758.25	77.1379
XM_015274380.1	LOC107050676	N6-adenosine-methyltransferase subunit METTL3	1.34624	Uncharacterized	Uncharacterized	Uncharacterized	3061.5	193.641	4121.5	593.327
XR_001463056.1	LOC107051285	Uncharacterized LOC107051285 (ncRNA)	1.48732	Uncharacterized	Uncharacterized	Uncharacterized	710	61.3188	1056	182.985
XR_001465193.1	LOC107052601	Uncharacterized LOC107052601 (ncRNA)	1.47783	Uncharacterized	Uncharacterized	Uncharacterized	67.6667	9.66782	100	10.4243
XM_015284811.1	LOC107053126	Translation initiation factor IF-2-like	1.26319	Uncharacterized	Uncharacterized	Uncharacterized	63042.3	4455.26	79634.8	5443.58
XM_015286133.1	LOC107053341	Pre--processing factor 19-like	1.3559	Uncharacterized	Uncharacterized	Uncharacterized	258.5	72.47	350.5	43.4012
XR_001466938.1	LOC107053566	Uncharacterized LOC107053566 (ncRNA)	1.48602	Uncharacterized	Uncharacterized	Uncharacterized	53.6667	6.97615	79.75	11.0567
XM_015292179.1	LOC107054221	Peptidyl-prolyl cis-trans isomerase FKBP8-like	1.67647	Uncharacterized	Uncharacterized	Uncharacterized	206.833	49.588	346.75	32.9684
XR_001468433.1	LOC107054291	Uncharacterized LOC107054291 (ncRNA)	1.43035	Uncharacterized	Uncharacterized	Uncharacterized	7318.5	1329.69	10468	479.734
XR_001469035.1	LOC107054604	Uncharacterized LOC107054604 (ncRNA)	1.42778	Uncharacterized	Uncharacterized	Uncharacterized	45	7.82304	64.25	3.0957
XM_015296614.1	LOC107054855	Corticoliberin-like	1.40476	Uncharacterized	Uncharacterized	Uncharacterized	31.5	6.1563	44.25	1.5
XR_001469705.1	LOC107054891	Uncharacterized LOC107054891 (ncRNA)	1.56653	Uncharacterized	Uncharacterized	Uncharacterized	41.3333	7.0899	64.75	5.85235
XM_015297718.1	LOC107055016	Transcription elongation factor A protein 3-like	1.584	Uncharacterized	Uncharacterized	Uncharacterized	41.6667	7.55425	66	9.34523
XM_015299240.1	LOC107055264	Feather keratin Cos1-1/Cos1-3/Cos2-1-like	1.72656	Uncharacterized	Uncharacterized	Uncharacterized	4063	718.757	7015	1039.73
XM_015299248.1	LOC107055267	Feather keratin Cos1-1/Cos1-3/Cos2-1-like	1.71716	Uncharacterized	Uncharacterized	Uncharacterized	4093.67	799.238	7029.5	1182.61
XM_015299983.1	LOC107055353	Uncharacterized LOC107055353	1.48112	Uncharacterized	Uncharacterized	Uncharacterized	211.833	39.7865	313.75	18.1177
XM_015301657.1	LOC107056637	Titin-like	1.64717	Uncharacterized	Uncharacterized	Uncharacterized	353.333	60.5001	582	78.158
XM_015302531.1	LOC107057451	Nectin-1-like	1.57229	Uncharacterized	Uncharacterized	Uncharacterized	359.667	39.3683	565.5	53.4821
XM_015302634.1	LOC107057550	Feather keratin Cos1-1/Cos1-3/Cos2-1-like	1.31496	Uncharacterized	Uncharacterized	Uncharacterized	63.5	6.2849	83.5	8.81287
XM_015302674.1	LOC107057605	Signal-transducing adaptor protein 2-like	1.4434	Uncharacterized	Uncharacterized	Uncharacterized	26.5	3.44964	38.25	3.30404
XR_001468545.1	LOC415913	High mobility group protein HMGI-C-like (ncRNA)	-1.69457	Uncharacterized	Uncharacterized	Uncharacterized	96.1667	32.3198	56.75	9.91211
XM_015289759.1	LOC424155	Uncharacterized LOC424155	-1.21578	Uncharacterized	Uncharacterized	Uncharacterized	1530.67	78.9928	1259	56.113
XM_015300458.1	LOC427010	Zinc finger RNA-binding protein-like	1.20846	Uncharacterized	Uncharacterized	Uncharacterized	112.333	4.67618	135.75	10.1448
XM_015295034.1	LOC768349	Myelin-oligodendrocyte glycoprotein-like	1.63201	Uncharacterized	Uncharacterized	Uncharacterized	359.833	63.2311	587.25	98.1202
XR_213878.2	LOC768418	Zinc finger FYVE domain-containing protein 16-like (ncRNA)	1.32432	Uncharacterized	Uncharacterized	Uncharacterized	166.5	19.0237	220.5	11.9024
XM_001234869.3	LOC771612	Mitochondrial fission factor homolog A-like	1.85164	Uncharacterized	Uncharacterized	Uncharacterized	214	31.5658	396.25	71.8117
XM_015296191.1	LOC772360	Uncharacterized LOC772360	1.44379	Uncharacterized	Uncharacterized	Uncharacterized	533.667	99.731	770.5	76.0592
XM_015295416.1	LUC7L3	LUC7-like 3 pre- splicing factor	1.33682	Other	Nucleus	splice site selection [GO:0006376]; RNA splicing [GO:0008380]	39.8333	1.60208	53.25	6.0208
XM_424533.5	MAK16	MAK16 homolog	1.21266	Other	Nucleus	Uncharacterized	3201.83	131.027	3882.75	447.226
XM_414607.5	MAML1	Mastermind-like 1 (Drosophila)	-1.20734	Transcription regulator	Nucleus	atrioventricular node cell development [GO:0060928]; atrioventricular node development [GO:0003162]; myoblast differentiation [GO:0045445]; Notch signaling pathway [GO:0007219]; positive regulation of myotube differentiation [GO:0010831]; positive regulation of Notch signaling pathway [GO:0045747]; positive regulation of transcription by RNA polymerase II [GO:0045944]; positive regulation of tran…	367.333	22.1781	304.25	20.7906
XM_015280565.1	MEF2C	Myocyte enhancer factor 2C	1.40018	Transcription regulator	Nucleus	apoptotic process [GO:0006915]; B cell homeostasis [GO:0001782]; B cell proliferation [GO:0042100]; B cell receptor signaling pathway [GO:0050853]; blood vessel development [GO:0001568]; blood vessel remodeling [GO:0001974]; cardiac muscle hypertrophy in response to stress [GO:0014898]; cardiac ventricle formation [GO:0003211]; cartilage morphogenesis [GO:0060536]; cell morphogenesis involved in …	95.1667	17.8708	133.25	14.9972
XR_001464428.1	MRRF	Mitochondrial ribosome recycling factor (misc_RNA)	-1.34439	Other	Cytoplasm	translation [GO:0006412]	141.833	10.9985	105.5	5.91608
XM_015290322.1	MTA1	Metastasis associated 1	1.36704	Transcription regulator	Nucleus	circadian regulation of gene expression [GO:0032922]; double-strand break repair [GO:0006302]; entrainment of circadian clock by photoperiod [GO:0043153]; histone deacetylation [GO:0016575]; locomotor rhythm [GO:0045475]; negative regulation of transcription by RNA polymerase II [GO:0000122]; positive regulation of protein autoubiquitination [GO:1902499]; proteasome-mediated ubiquitin-dependent p…	60.1667	3.48807	82.25	10.4363
XM_417403.4	mtg2	Mitochondrial ribosome-associated GTPase 2	1.50347	Uncharacterized	Mitochondrial inner membrane	regulation of mitochondrial translation [GO:0070129]; regulation of respiratory system process [GO:0044065]	431.667	21.7041	649	167.023
XM_015283310.1	MTIF2	Mitochondrial translational initiation factor 2	2.27704	Transcription regulator	Cytoplasm	mitochondrial translational initiation [GO:0070124]	87.8333	24.2769	200	45.0777
XM_015279090.1	MTMR6	Myotubularin related protein 6	-1.24415	Phosphatase	Cytoplasm	phosphatidylinositol biosynthetic process [GO:0006661]; phosphatidylinositol dephosphorylation [GO:0046856]; protein dephosphorylation [GO:0006470]	762.667	65.5612	613	37.5144
XM_415553.4	NDOR1	NADPH dependent diflavin oxidoreductase 1	-1.37475	Enzyme	Cytoplasm	cell death [GO:0008219]; cellular response to menadione [GO:0036245]; iron-sulfur cluster assembly [GO:0016226]; oxidation-reduction process [GO:0055114]	1167.17	105.099	849	73.2985
XM_015281275.1	NEBL	Nebulette	1.58397	Other	Plasma membrane	cardiac muscle thin filament assembly [GO:0071691]	175.667	36.626	278.25	37.3397
XM_414750.5	NPTX2	Neuronal pentraxin II	-4.83817	Other	Extracellular space	associative learning [GO:0008306]; chemical synaptic transmission [GO:0007268]; neuron projection development [GO:0031175]; regulation of postsynaptic neurotransmitter receptor activity [GO:0098962]	874.5	580.833	180.75	55.476
NM_001031555.1	NPY4R	Neuropeptide Y receptor Y4	1.45258	G-protein coupled receptor	Plasma membrane	Uncharacterized	17666.2	1901.58	25661.5	4485.8
XM_015278729.1	PAN3	PAN3 poly(A) specific ribonuclease subunit	-9.5742	Other	Cytoplasm	deadenylation-dependent decapping of nuclear-transcribed [GO:0000290]; processing [GO:0006397]; nuclear-transcribed poly(A) tail shortening [GO:0000289]; positive regulation of cytoplasmic processing body assembly [GO:0010606]; protein targeting [GO:0006605]; RNA phosphodiester bond hydrolysis, exonucleolytic [GO:0090503]	40166.2	87858.7	4195.25	42.937
XM_015297958.1	pcsk7	Proprotein convertase subtilisin/kexin type 7	1.29878	Uncharacterized	Integral component of Golgi membrane	peptide hormone processing [GO:0016486]; protein processing [GO:0016485]	776.5	70.6534	1008.5	133.677
XM_015281564.1	PFKP	Phosphofructokinase, platelet	-1.28753	Kinase	Cytoplasm	fructose 6-phosphate metabolic process [GO:0006002]	1166.5	159.219	906	112.354
XM_015293986.1	PITX1	Paired-like homeodomain 1	1.36546	Transcription regulator	Nucleus	anatomical structure morphogenesis [GO:0009653]; branchiomeric skeletal muscle development [GO:0014707]; cartilage development [GO:0051216]; embryonic hindlimb morphogenesis [GO:0035116]; myoblast fate commitment [GO:0048625]; negative regulation of transcription, DNA-templated [GO:0045892]; pituitary gland development [GO:0021983]; skeletal system development [GO:0001501]	12856.5	2046.75	17555	683.336
XM_015299646.1	PLEKHH3	Pleckstrin homology domain containing, family H (with MyTH4 domain) member 3	1.3975	Other	Extracellular space	signal transduction [GO:0007165]	126.833	12.0069	177.25	35.8736
XM_015299040.1	PLXNA2	Plexin A2	1.30335	Transmembrane receptor	Plasma membrane	centrosome localization [GO:0051642]; cerebellar granule cell precursor tangential migration [GO:0021935]; limb bud formation [GO:0060174]; negative regulation of cell adhesion [GO:0007162]; neural tube development [GO:0021915]; pharyngeal system development [GO:0060037]; positive regulation of axonogenesis [GO:0050772]; regulation of cell migration [GO:0030334]; regulation of cell shape [GO:0008…	54.6667	5.46504	71.25	7.18215
XM_015299789.1	POLE4	Polymerase (DNA-directed), epsilon 4, accessory subunit	1.47767	Enzyme	Nucleus	G1/S transition of mitotic cell cycle [GO:0000082]; histone H3 acetylation [GO:0043966]	9000.17	1266.33	13299.2	1264.2
XM_015300004.1	POLRMT	Polymerase (RNA) mitochondrial (DNA directed)	1.48765	Enzyme	Cytoplasm	mitochondrial transcription [GO:0006390]; mitochondrion organization [GO:0007005]; transcription initiation from mitochondrial promoter [GO:0006391]	12728.7	1238.79	18935.8	1788.41
XM_015290381.1	PPFIBP1	PTPRF interacting protein, binding protein 1 (liprin beta 1)	-1.21568	Other	Plasma membrane	cell adhesion [GO:0007155]	5249	178.048	4317.75	552.282
XM_015274884.1	PPOX	Protoporphyrinogen oxidase	1.45411	Enzyme	Cytoplasm	heme biosynthetic process [GO:0006783]; oxidation-reduction process [GO:0055114]; porphyrin-containing compound biosynthetic process [GO:0006779]; protoporphyrinogen IX biosynthetic process [GO:0006782]; response to drug [GO:0042493]	593.833	38.9174	863.5	107.308
XM_015285029.1	PREB	Prolactin regulatory element binding	1.33347	Transcription regulator	Nucleus	Uncharacterized	397.833	28.2377	530.5	70.9107
XM_015289903.1	R3HDM1	R3H domain containing 1	1.33158	Other	Other	Uncharacterized	648.667	130.239	863.75	38.0734
NM_205307.2	RAF1	Raf-1 proto-oncogene, serine/threonine kinase	1.49751	Kinase	Cytoplasm	activation of adenylate cyclase activity [GO:0007190]; activation of MAPKK activity [GO:0000186]; cell differentiation [GO:0030154]; death-inducing signaling complex assembly [GO:0071550]; face development [GO:0060324]; insulin secretion involved in cellular response to glucose stimulus [GO:0035773]; intermediate filament cytoskeleton organization [GO:0045104]; MAPK cascade [GO:0000165]; negative…	11759.8	1203.3	17610.5	1950.46
XR_001464572.1	RALGPS1	Ral GEF with PH domain and SH3 binding motif 1 (misc_RNA)	1.50248	Other	Cytoplasm	intracellular signal transduction [GO:0035556]; regulation of Ral protein signal transduction [GO:0032485]; small GTPase mediated signal transduction [GO:0007264]	302.5	67.5892	454.5	44.155
NM_001006401.1	RASGRP3	RAS guanyl releasing protein 3 (calcium and DAG-regulated)	-1.37168	Other	Cytoplasm	Ras protein signal transduction [GO:0007265]	661.833	133.443	482.5	72.0671
NM_001006288.1	RPN2	Ribophorin II	1.24296	Enzyme	Cytoplasm	proteasome assembly [GO:0043248]; proteasome-mediated ubiquitin-dependent protein catabolic process [GO:0043161]; regulation of protein catabolic process [GO:0042176]; ubiquitin-dependent protein catabolic process [GO:0006511]	10829.2	592.603	13460.2	843.687
NM_001031075.2	RWDD1	RWD domain containing 1	1.24671	Other	Cytoplasm	androgen receptor signaling pathway [GO:0030521]; cell aging [GO:0007569]; cellular response to oxidative stress [GO:0034599]; cellular response to testosterone stimulus [GO:0071394]; cytoplasmic translation [GO:0002181]; positive regulation of androgen receptor activity [GO:2000825]	1150.83	79.4869	1434.75	128.089
XM_004947117.2	SAMD10	Sterile alpha motif domain containing 10	1.42416	Other	Other	Uncharacterized	29.6667	3.01109	42.25	6.18466
NM_001277889.1	SDHAF2	Protein LOC102723830	1.43695	Other	Extracellular space	mitochondrial electron transport, succinate to ubiquinone [GO:0006121]; mitochondrial respiratory chain complex II assembly [GO:0034553]; negative regulation of canonical Wnt signaling pathway [GO:0090090]; negative regulation of epithelial to mesenchymal transition [GO:0010719]; protein dephosphorylation [GO:0006470]; protein-FAD linkage [GO:0018293]; tricarboxylic acid cycle [GO:0006099]	11959.2	1698.73	17184.8	1624.47
XM_015299414.1	SETD4	SET domain containing 4	-1.34904	Other	Other	peptidyl-lysine monomethylation [GO:0018026]; peptidyl-lysine trimethylation [GO:0018023]	128.833	16.2901	95.5	8.18535
XM_015293903.1	SGCD	Sarcoglycan, delta (35kDa dystrophin-associated glycoprotein)	-1.34043	Other	Cytoplasm	calcium ion homeostasis [GO:0055074]; calcium-mediated signaling [GO:0019722]; cardiac muscle cell contraction [GO:0086003]; cardiac muscle fiber development [GO:0048739]; cell death [GO:0008219]; cellular protein-containing complex localization [GO:0034629]; coronary vasculature morphogenesis [GO:0060977]; heart contraction [GO:0060047]; muscle organ development [GO:0007517]	2799.83	257.99	2088.75	207.114
XM_015299916.1	SH3GL1	SH3-domain GRB2-like 1	1.58721	Other	Cytoplasm	synaptic vesicle uncoating [GO:0016191]	43	12.1984	68.25	5.25198
NM_204231.2	SLC25A6	Solute carrier family 25 (mitochondrial carrier; adenine nucleotide translocator), member 6	-1.31087	Transporter	Cytoplasm	Uncharacterized	17526.7	3896.53	13370.2	798.213
XM_015287077.1	SNAP23	Synaptosomal-associated protein, 23kDa	-1.20576	Transporter	Plasma membrane	exocytosis [GO:0006887]; histamine secretion by mast cell [GO:0002553]; synaptic vesicle fusion to presynaptic active zone membrane [GO:0031629]; synaptic vesicle priming [GO:0016082]; vesicle fusion [GO:0006906]	3242	80.3841	2688.75	233.567
NM_001293321.1	SNX20	Sorting nexin 20	-1.5192	Other	Cytoplasm	protein transport [GO:0015031]	392.333	30.3425	258.25	49.1282
NM_001031061.1	SPAST	Spastin	1.38963	Enzyme	Nucleus	anterograde axonal transport [GO:0008089]; axonal transport of mitochondrion [GO:0019896]; axonogenesis [GO:0007409]; cytokinetic process [GO:0032506]; cytoplasmic microtubule organization [GO:0031122]; ER to Golgi vesicle-mediated transport [GO:0006888]; exit from mitosis [GO:0010458]; membrane fission [GO:0090148]; microtubule bundle formation [GO:0001578]; microtubule severing [GO:0051013]; mi…	249.167	17.4518	346.25	45.8939
XM_015278730.1	SPRN	Shadow of prion protein homolog (zebrafish)	1.60293	Other	Nucleus	protein import into nucleus [GO:0006606]	330.333	45.6362	529.5	79.9104
XM_015277414.1	ST8SIA5	ST8 alpha-N-acetyl-neuraminide alpha-2,8-sialyltransferase 5	1.55189	Enzyme	Cytoplasm	carbohydrate metabolic process [GO:0005975]; glycosphingolipid biosynthetic process [GO:0006688]; protein glycosylation [GO:0006486]	101.167	16.4124	157	30.692
XM_015290266.1	STXBP3	Syntaxin binding protein 3	-1.39028	Transporter	Plasma membrane	brain development [GO:0007420]; cellular glucose homeostasis [GO:0001678]; cellular response to interferon-gamma [GO:0071346]; insulin secretion [GO:0030073]; negative regulation of calcium ion-dependent exocytosis [GO:0045955]; negative regulation of glucose import [GO:0046325]; neutrophil degranulation [GO:0043312]; platelet aggregation [GO:0070527]; protein heterooligomerization [GO:0051291]; …	69.1667	5.84523	49.75	7.41058
XM_417811.4	SYNC	Syncoilin, intermediate filament protein	1.42614	Other	Cytoplasm	intermediate filament-based process [GO:0045103]	44	4.89898	62.75	10.5
XM_004948527.2	TANC2	Tetratricopeptide repeat, ankyrin repeat and coiled-coil containing 2	-1.51437	Transcription regulator	Nucleus	in utero embryonic development [GO:0001701]	87.8333	5.34478	58	10.5198
XM_004934806.2	TBC1D22B	TBC1 domain family, member 22B	1.45823	Other	Other	activation of GTPase activity [GO:0090630]; intracellular protein transport [GO:0006886]	634.5	63.7895	925.25	146.236
XM_015286350.1	TEAD1	TEA domain family member 1 (SV40 transcriptional enhancer factor)	1.26031	Transcription regulator	Nucleus	hippo signaling [GO:0035329]	129.333	9.28799	163	10.0995
NM_001006582.1	tmem175	Transmembrane protein 175	-1.23491	Uncharacterized	Integral component of membrane	phagosome-lysosome fusion [GO:0090385]; potassium ion transmembrane transport [GO:0071805]; regulation of lysosomal lumen pH [GO:0035751]	443.333	32.5556	359	31.5172
XM_015296028.1	TMEM248	Transmembrane protein 248	-1.93558	Other	Other	Uncharacterized	215.333	111.171	111.25	16.9386
XM_015281735.1	TMEM42	Transmembrane protein 42	1.20244	Other	Other	Uncharacterized	696.5	49.8668	837.5	35.5949
XM_015277264.1	TPM2	Tropomyosin 2 (beta)	1.49867	Other	Other	Uncharacterized	377	63.274	565	23.8048
XM_015280337.1	TRPM3	Transient receptor potential cation channel, subfamily M, member 3	1.39464	Ion channel	Plasma membrane	calcium ion transmembrane transport [GO:0070588]; cation transport [GO:0006812]; detection of temperature stimulus [GO:0016048]; protein tetramerization [GO:0051262]; sensory perception of temperature stimulus [GO:0050951]	90.1667	19.6409	125.75	9.17878
XM_015288931.1	TRUB1	TruB pseudouridine (psi) synthase family member 1	-1.744	Enzyme	Other	pseudouridine synthesis [GO:1990481]; tRNA modification [GO:0006400]	54.5	21.806	31.25	5.67891
XM_416397.3	TUBA8A	Tubulin, alpha 8a	2.17694	Uncharacterized	Cytoplasm	microtubule-based process [GO:0007017]; microtubule cytoskeleton organization [GO:0000226]; mitotic cell cycle [GO:0000278]	1084.67	258.375	2361.25	461.585
XM_015289164.1	UBE2F	Ubiquitin-conjugating enzyme E2F (putative)	1.22507	Enzyme	Cytoplasm	protein neddylation [GO:0045116]	7009	1068.58	8586.5	198.347
XM_015279016.1	UBE2Q2	Ubiquitin-conjugating enzyme E2Q family member 2	1.299	Enzyme	Cytoplasm	protein K48-linked ubiquitination [GO:0070936]; protein ubiquitination [GO:0016567]	8531.17	895.389	11082	800.123
XM_015273208.1	UBTF	Upstream binding transcription factor, RNA polymerase I	1.44407	Transcription regulator	Nucleus	positive regulation of transcription by RNA polymerase I [GO:0045943]; regulation of transcription by RNA polymerase I [GO:0006356]; termination of RNA polymerase I transcription [GO:0006363]; transcription by RNA polymerase I [GO:0006360]; transcription initiation from RNA polymerase I promoter [GO:0006361]	98.3333	5.04645	142	17.6257
XM_015300099.1	USHBP1	Usher syndrome 1C binding protein 1	1.60331	Other	Other	Uncharacterized	60.5	8.64292	97	13.7113
XM_015292679.1	VPS4A	Uncharacterized protein	1.28731	Enzyme	Cytoplasm	abscission [GO:0009838]; actomyosin contractile ring contraction [GO:0000916]; cell division [GO:0051301]; cytoskeleton-dependent cytokinesis [GO:0061640]; endosomal transport [GO:0016197]; endosomal vesicle fusion [GO:0034058]; ESCRT complex disassembly [GO:1904896]; ESCRT III complex disassembly [GO:1904903]; intracellular cholesterol transport [GO:0032367]; late endosomal microautophagy [GO:00…	805.167	62.7261	1036.5	97.0653
XM_004948611.2	ZNF385C	Zinc finger protein 385C	1.54787	Other	Other	Uncharacterized	78.3333	16.6092	121.25	12.2848

## Sheet: C3 Severe_Mild (2)
NCBI Accession	Gene Symbol	Description	Fold change	Type	Cellular component	Biological process	Mild mean	Mild std.dev.	Severe mean	Severe std.dev.
XM_004945323.1	ABAT	4-aminobutyrate aminotransferase	-1.34603	Enzyme	Cytoplasm	aging [GO:0007568]; behavioral response to cocaine [GO:0048148]; cerebellum development [GO:0021549]; copulation [GO:0007620]; exploration behavior [GO:0035640]; gamma-aminobutyric acid biosynthetic process [GO:0009449]; gamma-aminobutyric acid catabolic process [GO:0009450]; locomotory behavior [GO:0007626]; negative regulation of blood pressure [GO:0045776]; negative regulation of dopamine secr…	565.333	68.6751	420	37.1573
XM_004945434.2	ABCA3	ATP-binding cassette, sub-family A (ABC1), member 3	1.21915	Transporter	Plasma membrane	lipid transport [GO:0006869]	1506.17	167.709	1836.25	145.509
XM_015285027.1	ABHD1	Abhydrolase domain containing 1	1.40225	Other	Other	cellular lipid metabolic process [GO:0044255]; medium-chain fatty acid biosynthetic process [GO:0051792]; medium-chain fatty acid catabolic process [GO:0051793]	1140.67	78.3471	1599.5	245.151
XM_015292736.1	AC108938.5	LIM and senescent cell antigen-like-containing domain protein 1-like	1.88282	Uncharacterized	Uncharacterized	Uncharacterized	231.833	29.8223	436.5	133.403
XM_015279688.1	AKNA	AT-hook transcription factor	1.56774	Transcription regulator	Nucleus	positive regulation of transcription by RNA polymerase II [GO:0045944]	77.5	11.2205	121.5	13.772
NM_001006187.1	ANAPC5	Anaphase promoting complex subunit 5	-1.20119	Other	Nucleus	anaphase-promoting complex-dependent catabolic process [GO:0031145]; cell cycle [GO:0007049]; cell division [GO:0051301]; positive regulation of mitotic metaphase/anaphase transition [GO:0045842]; protein K11-linked ubiquitination [GO:0070979]	574.167	24.1944	478	22.6421
XM_015288067.1	ANK3	Ankyrin 3, node of Ranvier (ankyrin G)	-1.26375	Other	Plasma membrane	Golgi to plasma membrane protein transport [GO:0043001]; maintenance of protein location in plasma membrane [GO:0072660]; membrane assembly [GO:0071709]; mitotic cytokinesis [GO:0000281]; plasma membrane organization [GO:0007009]; signal transduction [GO:0007165]	5796.17	515.961	4586.5	281.698
XM_015272643.1	ANKRD13D	Ankyrin repeat domain 13 family member D	1.23902	Other	Plasma membrane	Uncharacterized	717.5	50.7967	889	73.3803
XM_015286183.1	ANO5	Anoctamin 5	-1.22587	Ion channel	Plasma membrane	Uncharacterized	4321.5	250.207	3525.25	232.216
XM_015280934.1	APBB1	Amyloid beta (A4) precursor protein-binding, family B, member 1 (Fe65)	1.26273	Transcription regulator	Cytoplasm	apoptotic process [GO:0006915]; axonogenesis [GO:0007409]; cell cycle arrest [GO:0007050]; cellular response to DNA damage stimulus [GO:0006974]; double-strand break repair [GO:0006302]; histone H4 acetylation [GO:0043967]; negative regulation of cell growth [GO:0030308]; negative regulation of thymidylate synthase biosynthetic process [GO:0050760]; negative regulation of transcription by RNA pol…	2288.5	97.4777	2889.75	329.92
XM_001233301.4	APH1A	Anterior pharynx defective 1 homolog A (C. elegans)	1.29746	Peptidase	Cytoplasm	amyloid-beta formation [GO:0034205]; membrane protein ectodomain proteolysis [GO:0006509]; membrane protein intracellular domain proteolysis [GO:0031293]; metanephros development [GO:0001656]; Notch receptor processing [GO:0007220]; Notch signaling pathway [GO:0007219]; positive regulation of catalytic activity [GO:0043085]; protein processing [GO:0016485]	2826.67	221.647	3667.5	385.351
XM_015277433.1	AQP7	Aquaporin 7	1.67771	Transporter	Plasma membrane	excretion [GO:0007588]; generation of precursor metabolites and energy [GO:0006091]; glycerol transport [GO:0015793]; water transport [GO:0006833]	536	68.6265	899.25	59.2699
XM_015284922.1	ARHGEF10	Rho guanine nucleotide exchange factor (GEF) 10	1.41112	Enzyme	Cytoplasm	actin cytoskeleton organization [GO:0030036]; activation of GTPase activity [GO:0090630]; centrosome duplication [GO:0051298]; mitotic spindle assembly [GO:0090307]; myelination in peripheral nervous system [GO:0022011]; positive regulation of stress fiber assembly [GO:0051496]; regulation of Rho protein signal transduction [GO:0035023]	137.833	14.5522	194.5	21.1108
XM_015298449.1	ARHGEF11	Rho guanine nucleotide exchange factor (GEF) 11	1.31694	Other	Cytoplasm	actin cytoskeleton organization [GO:0030036]; establishment of cell polarity [GO:0030010]; G protein-coupled receptor signaling pathway [GO:0007186]; positive regulation of apoptotic process [GO:0043065]; positive regulation of transcription, DNA-templated [GO:0045893]; regulation of cell growth [GO:0001558]; regulation of Rho protein signal transduction [GO:0035023]; regulation of small GTPase m…	1282.33	115.264	1688.75	186.67
NM_001012902.2	ARID4A	AT rich interactive domain 4A (RBP1-like)	-1.411	Transcription regulator	Nucleus	erythrocyte development [GO:0048821]; establishment of Sertoli cell barrier [GO:0097368]; histone H3-K4 trimethylation [GO:0080182]; histone H3-K9 trimethylation [GO:0036124]; histone H4-K20 trimethylation [GO:0034773]; negative regulation of transcription, DNA-templated [GO:0045892]; positive regulation of transcription by RNA polymerase II [GO:0045944]; regulation of gene expression by genetic …	145.333	24.5493	103	17.0685
XM_015285046.1	ATAD2B	ATPase family, AAA domain containing 2B	-1.28182	Other	Nucleus	negative regulation of chromatin silencing [GO:0031936]; positive regulation of transcription by RNA polymerase II [GO:0045944]	282	17.9332	220	43.9621
XM_015274099.1	ATP5SL	ATP5S-like	1.40407	Uncharacterized	Mitochondrial respiratory chain complex I assembly	mitochondrial respiratory chain complex I assembly [GO:0032981]; protein ubiquitination [GO:0016567]; SCF-dependent proteasomal ubiquitin-dependent protein catabolic process [GO:0031146]; ubiquitin-dependent protein catabolic process [GO:0006511]	1566.17	148.598	2199	304.279
XM_015285475.1	ATP8A1	ATPase, aminophospholipid transporter (APLT), class I, type 8A, member 1	-1.28417	Transporter	Cytoplasm	ion transmembrane transport [GO:0034220]; learning [GO:0007612]; neutrophil degranulation [GO:0043312]; phospholipid translocation [GO:0045332]; positive regulation of cell migration [GO:0030335]; positive regulation of phospholipid translocation [GO:0061092]	1040.5	116.124	810.25	96.8689
XM_015293045.1	ATRIP	ATR interacting protein	-1.47166	Kinase	Nucleus	DNA damage checkpoint [GO:0000077]; DNA replication [GO:0006260]; interstrand cross-link repair [GO:0036297]	127.667	11.7927	86.75	15.2179
XM_015287960.1	BMPR1A	Bone morphogenetic protein receptor, type IA	-1.22942	Kinase	Plasma membrane	BMP signaling pathway [GO:0030509]; BMP signaling pathway involved in heart development [GO:0061312]; cardiac conduction system development [GO:0003161]; cardiac right ventricle morphogenesis [GO:0003215]; cellular response to BMP stimulus [GO:0071773]; chondrocyte differentiation [GO:0002062]; developmental growth [GO:0048589]; dorsal/ventral axis specification [GO:0009950]; dorsal aorta morphog…	1390.17	63.2627	1130.75	78.6654
XM_015296560.1	BOC	BOC cell adhesion associated, oncogene regulated	1.73077	Other	Plasma membrane	axon guidance [GO:0007411]; cell adhesion [GO:0007155]; positive regulation of muscle cell differentiation [GO:0051149]; positive regulation of myoblast differentiation [GO:0045663]; smoothened signaling pathway [GO:0007224]	65	26.6908	112.5	7.59386
XM_015284532.1	BRAF	V-raf murine sarcoma viral oncogene homolog B	-1.25161	Kinase	Cytoplasm	CD4-positive, alpha-beta T cell differentiation [GO:0043367]; CD4-positive or CD8-positive, alpha-beta T cell lineage commitment [GO:0043369]; cellular response to calcium ion [GO:0071277]; cellular response to drug [GO:0035690]; establishment of protein localization to membrane [GO:0090150]; face development [GO:0060324]; head morphogenesis [GO:0060323]; intracellular signal transduction [GO:003…	469.667	14.5556	375.25	69.4712
NM_204449.1	BRINP1	Bone morphogenetic protein/retinoic acid inducible neural-specific 1	1.63125	Peptidase	Nucleus	behavioral fear response [GO:0001662]; cell cycle arrest [GO:0007050]; cell death [GO:0008219]; cellular response to retinoic acid [GO:0071300]; exploration behavior [GO:0035640]; maternal behavior [GO:0042711]; negative regulation of cell cycle [GO:0045786]; negative regulation of mitotic cell cycle [GO:0045930]; negative regulation of neurogenesis [GO:0050768]; positive regulation of neuron dif…	26.6667	7.94145	43.5	4.50925
XM_015278524.1	BRWD3	Bromodomain and WD repeat domain containing 3	-1.39124	Other	Other	cytoskeleton organization [GO:0007010]; regulation of cell shape [GO:0008360]; regulation of transcription by RNA polymerase II [GO:0006357]	156.167	21.2171	112.25	12.9968
XM_015276318.1	BTC	Betacellulin	1.38605	Growth factor	Extracellular space	Uncharacterized	3758.33	657.19	5209.25	488.235
XM_015286078.1	C12orf75	Chromosome 12 open reading frame 75	1.47993	Other	Other	Uncharacterized	149.5	17.6946	221.25	24.5272
XM_015297133.1	C21H1orf159	Chromosome 21 open reading frame, human C1orf159	-1.72989	Uncharacterized	Uncharacterized	Uncharacterized	50.1667	13.4375	29	3.4641
XM_015288893.1	C6H10orf88	Chromosome 6 open reading frame, human C10orf88	-1.26409	Uncharacterized	Uncharacterized	Uncharacterized	1773.83	116.127	1403.25	44.8878
XM_015282853.1	C8orf59	Chromosome 8 open reading frame 59	1.33162	Other	Other	Uncharacterized	340	65.3208	452.75	33.3404
XM_015292987.1	CACNA1D	Calcium channel, voltage-dependent, L type, alpha 1D subunit	1.81552	Ion channel	Plasma membrane	adenylate cyclase-modulating G protein-coupled receptor signaling pathway [GO:0007188]; calcium ion import [GO:0070509]; cardiac muscle cell action potential involved in contraction [GO:0086002]; positive regulation of adenylate cyclase activity [GO:0045762]; positive regulation of calcium ion transport [GO:0051928]; regulation of atrial cardiac muscle cell membrane repolarization [GO:0060372]; r…	193.333	46.0377	351	109.532
XM_015293303.1	CADPS	Ca++-dependent secretion activator	1.53758	Other	Plasma membrane	dense core granule exocytosis [GO:1990504]; exocytosis [GO:0006887]; protein transport [GO:0015031]; synaptic vesicle exocytosis [GO:0016079]	1277.17	406.198	1963.75	96.7139
XM_015276281.1	CAMK2D	Calcium/calmodulin-dependent protein kinase II delta	1.29207	Kinase	Cytoplasm	Uncharacterized	1005.17	106.946	1298.75	58.2602
XM_015299553.1	CASC3	Cancer susceptibility candidate 3	1.24824	Other	Nucleus	intracellular mRNA localization [GO:0008298]; mRNA 3'-end processing [GO:0031124]; mRNA export from nucleus [GO:0006406]; mRNA splicing, via spliceosome [GO:0000398]; nuclear-transcribed mRNA catabolic process, nonsense-mediated decay [GO:0000184]; regulation of translation [GO:0006417]; RNA export from nucleus [GO:0006405]	3069.33	91.5722	3831.25	516.83
XM_015295441.1	CASKIN2	CASK interacting protein 2	-1.26213	Other	Cytoplasm	Uncharacterized	1016.33	70.9695	805.25	65.0814
XM_015289374.1	casp8	Caspase 8, apoptosis-related cysteine peptidase	-1.21611	Uncharacterized	Death-inducing signaling complex	activation of cysteine-type endopeptidase activity [GO:0097202]; activation of cysteine-type endopeptidase activity involved in apoptotic process [GO:0006919]; activation of cysteine-type endopeptidase activity involved in apoptotic signaling pathway [GO:0097296]; apoptotic process [GO:0006915]; apoptotic signaling pathway [GO:0097190]; B cell activation [GO:0042113]; cell surface receptor signal…	420.167	19.6715	345.5	38.5616
XM_015299478.1	CBX1	Chromobox homolog 1	1.38217	Transcription regulator	Nucleus	cellular response to DNA damage stimulus [GO:0006974]; negative regulation of transcription, DNA-templated [GO:0045892]	78.5	11.8448	108.5	9.60902
XM_424681.5	CCDC124	Coiled-coil domain containing 124	1.65647	Other	Other	cell cycle [GO:0007049]; cell division [GO:0051301]	1356.5	101.502	2247	295.467
XM_015296682.1	CCDC181	Coiled-coil domain containing 181	-1.48031	Other	Nucleus	Uncharacterized	47	3.68782	31.75	3.94757
XM_420475.5	CCNG2	Cyclin G2	-1.3428	Other	Nucleus	mitotic cell cycle [GO:0000278]; positive regulation of cell cycle [GO:0045787]; positive regulation of cell proliferation [GO:0008284]; protein phosphorylation [GO:0006468]; regulation of cyclin-dependent protein serine/threonine kinase activity [GO:0000079]; regulation of mitotic nuclear division [GO:0007088]	1441.5	199.722	1073.5	160.641
XM_015286077.1	CD5	CD5 molecule	1.41963	Transmembrane receptor	Plasma membrane	Uncharacterized	1253.5	239.322	1779.5	26.1343
XM_015278994.1	CDK8	Cyclin-dependent kinase 8	-1.39566	Kinase	Nucleus	positive regulation of transcription by RNA polymerase II [GO:0045944]; protein phosphorylation [GO:0006468]; transcription initiation from RNA polymerase II promoter [GO:0006367]	85.8333	2.31661	61.5	9.03696
XM_015283977.1	CEP170	Centrosomal protein 170kDa	-1.39216	Other	Nucleus	Uncharacterized	59.1667	7.78246	42.5	3.31662
XM_015289423.1	CFLAR	CASP8 and FADD-like apoptosis regulator	-1.27778	Other	Cytoplasm	regulation of apoptotic process [GO:0042981]	134.167	14.9588	105	13.4412
XM_015298641.1	CIART	Circadian associated repressor of transcription	1.36683	Other	Nucleus	circadian regulation of gene expression [GO:0032922]; locomotor rhythm [GO:0045475]; negative regulation of transcription, DNA-templated [GO:0045892]	99.5	6.34823	136	15.5563
NM_001277632.1	COMMD4	COMM domain containing 4	1.25527	Other	Cytoplasm	Uncharacterized	1319.83	31.8083	1656.75	263.668
XM_415478.5	CRAT	Carnitine O-acetyltransferase	-1.29025	Enzyme	Cytoplasm	carnitine metabolic process, CoA-linked [GO:0019254]; fatty acid metabolic process [GO:0006631]	5396.17	449.934	4182.25	202.377
XM_015282768.1	CRISPLD1	Cysteine-rich secretory protein LCCL domain containing 1	-1.27904	Other	Cytoplasm	face morphogenesis [GO:0060325]	168.833	19.783	132	16.2686
NM_205177.1	CTSD	Cathepsin D	1.3464	Peptidase	Cytoplasm	cell death [GO:0008219]; programmed cell death [GO:0012501]; protein catabolic process [GO:0030163]; proteolysis [GO:0006508]	791	97.9816	1065	97.7582
NM_001098539.1	CTTNBP2	Cortactin binding protein 2	-1.27982	Other	Cytoplasm	brain development [GO:0007420]; regulation of modification of postsynaptic actin cytoskeleton [GO:1905274]	191.333	18.6512	149.5	18.5203
XM_004949166.2	CZH9orf40	Chromosome Z open reading frame, similar to C9ORF40	-1.2256	Uncharacterized	Uncharacterized	Uncharacterized	422.833	32.957	345	9.20145
XM_015301312.1	DCTN1	Dynactin 1	1.55985	Other	Cytoplasm	cell division [GO:0051301]; cytoplasmic microtubule organization [GO:0031122]; establishment of mitotic spindle orientation [GO:0000132]; positive regulation of intracellular protein transport [GO:0090316]; regulation of mitotic spindle organization [GO:0060236]; transport along microtubule [GO:0010970]	196.333	22.2681	306.25	58.6991
XM_004940918.2	DDX60	DEAD (Asp-Glu-Ala-Asp) box polypeptide 60	-2.06914	Enzyme	Cytoplasm	defense response to virus [GO:0051607]; innate immune response [GO:0045087]; positive regulation of MDA-5 signaling pathway [GO:1900245]; positive regulation of RIG-I signaling pathway [GO:1900246]; response to virus [GO:0009615]	69.8333	11.1609	33.75	11.644
XM_015290092.1	DES	Desmin	1.64399	Other	Cytoplasm	intermediate filament organization [GO:0045109]	12672.7	3046.26	20833.8	2089.09
XM_015299468.1	DLX4	Distal-less homeobox 4	1.66667	Transcription regulator	Nucleus	multicellular organism development [GO:0007275]; negative regulation of transcription by RNA polymerase II [GO:0000122]; regulation of transcription, DNA-templated [GO:0006355]	33	5.72713	55	6.78233
XM_004945467.2	DNAH3	Dynein, axonemal, heavy chain 3	-1.25485	Enzyme	Extracellular space	cilium movement [GO:0003341]; microtubule-based movement [GO:0007018]	221.167	30.0094	176.25	19.906
XM_015284871.1	DST	Dystonin	-1.20567	Other	Plasma membrane	cell adhesion [GO:0007155]; cell motility [GO:0048870]; cytoplasmic microtubule organization [GO:0031122]; cytoskeleton organization [GO:0007010]; hemidesmosome assembly [GO:0031581]; integrin-mediated signaling pathway [GO:0007229]; intermediate filament cytoskeleton organization [GO:0045104]; maintenance of cell polarity [GO:0030011]; microtubule cytoskeleton organization [GO:0000226]; response…	574.5	48.1778	476.5	17.9351
XM_001233549.4	dyl2	Dynein light chain 2 cytoplasmic	1.30495	Uncharacterized	Cytoplasm	microtubule-based process [GO:0007017]; positive regulation of ATP-dependent microtubule motor activity, plus-end-directed [GO:2000582]	53.8333	4.75044	70.25	6.29153
XM_015296106.1	EFCAB5	EF-hand calcium binding domain 5	-1.47105	Other	Other	Uncharacterized	156.667	32.9828	106.5	12.6623
XM_015278111.1	EHBP1	EH domain binding protein 1	1.3177	Other	Cytoplasm	endocytosis [GO:0006897]; protein transport [GO:0015031]	1647	202.706	2170.25	219.503
XM_423512.5	EIF2B4	Eukaryotic translation initiation factor 2B, subunit 4 delta, 67kDa	1.28409	Other	Cytoplasm	myelination [GO:0042552]; oligodendrocyte development [GO:0014003]; ovarian follicle development [GO:0001541]; regulation of translation [GO:0006417]; response to glucose [GO:0009749]; response to heat [GO:0009408]; response to peptide hormone [GO:0043434]; T cell receptor signaling pathway [GO:0050852]; translational initiation [GO:0006413]	947.167	71.5525	1216.25	125.606
XM_015274134.1	ELP5	Elongator complex protein 5-like	1.32006	Other	Cytoplasm	tRNA modification [GO:0006400]; tRNA wobble uridine modification [GO:0002098]	1702	139.91	2246.75	279.521
XM_414188.5	EMC8	ER membrane protein complex subunit 8	-1.33826	Other	Cytoplasm	Uncharacterized	2806	298.049	2096.75	136.607
XM_015300170.1	EPS15L1	Epidermal growth factor receptor pathway substrate 15-like 1	-1.27778	Other	Plasma membrane	endocytosis [GO:0006897]; membrane organization [GO:0061024]; negative regulation of epidermal growth factor receptor signaling pathway [GO:0042059]	230	7.92464	180	20.7686
XM_015274512.1	ERCC5	Excision repair cross-complementing rodent repair deficiency, complementation group 5 (xeroderma pigmentosum, complementation group G (Cockayne syndrome))	-1.4592	Enzyme	Nucleus	negative regulation of apoptotic process [GO:0043066]; nucleotide-excision repair [GO:0006289]; nucleotide-excision repair, DNA incision [GO:0033683]; nucleotide-excision repair, DNA incision, 3'-to lesion [GO:0006295]; nucleotide-excision repair, DNA incision, 5'-to lesion [GO:0006296]; nucleotide-excision repair, preincision complex assembly [GO:0006294]; nucleotide-excision repair, preincision…	651.167	41.9972	446.25	76.8825
NM_001278029.1	erich1	Glutamate-rich 1	-1.32579	Uncharacterized	Uncharacterized	Uncharacterized	87.8333	13.5708	66.25	7.58837
XM_015282888.1	EYA1	Eyes absent homolog 1 (Drosophila)	1.59202	Phosphatase	Nucleus	anatomical structure development [GO:0048856]; anatomical structure morphogenesis [GO:0009653]; aorta morphogenesis [GO:0035909]; branching involved in ureteric bud morphogenesis [GO:0001658]; cochlea morphogenesis [GO:0090103]; double-strand break repair [GO:0006302]; embryonic skeletal system morphogenesis [GO:0048704]; histone dephosphorylation [GO:0016576]; mesodermal cell fate specification …	81.5	21.5012	129.75	24.9583
XM_015287665.1	FAM161B	Family with sequence similarity 161, member B	1.85633	Other	Cytoplasm	cilium organization [GO:0044782]	117.167	24.2604	217.5	47.5009
XM_015285864.1	FAM193A	Family with sequence similarity 193 member A	-1.30769	Other	Other	Uncharacterized	110.5	8.96103	84.5	12.6623
XM_015277470.1	FAM214B	Family with sequence similarity 214, member B	1.32014	Other	Nucleus	Uncharacterized	73.6667	5.60952	97.25	7.32006
XM_015285563.1	FAT1	FAT atypical cadherin 1	1.31667	Other	Plasma membrane	actin filament organization [GO:0007015]; anatomical structure morphogenesis [GO:0009653]; camera-type eye morphogenesis [GO:0048593]; cell adhesion [GO:0007155]; cell-cell adhesion [GO:0098609]; cell-cell signaling [GO:0007267]; cell migration [GO:0016477]; epithelial cell morphogenesis [GO:0003382]; establishment or maintenance of cell polarity [GO:0007163]; establishment or maintenance of epit…	165	16.9588	217.25	8.61684
XM_015290719.1	FNBP1L	Formin binding protein 1-like	-1.27978	Other	Cytoplasm	autophagy [GO:0006914]; cilium assembly [GO:0060271]; clathrin-dependent endocytosis [GO:0072583]; membrane invagination [GO:0010324]; membrane organization [GO:0061024]; plasma membrane tubulation [GO:0097320]; positive regulation of filopodium assembly [GO:0051491]; vesicle budding from membrane [GO:0006900]; vesicle organization [GO:0016050]; vesicle transport along actin filament [GO:0030050]	657.167	58.5403	513.5	40.4681
XM_004938468.2	GABRA5	Gamma-aminobutyric acid (GABA) A receptor, alpha 5	1.29691	Ion channel	Plasma membrane	associative learning [GO:0008306]; behavioral fear response [GO:0001662]; chemical synaptic transmission [GO:0007268]; chloride transmembrane transport [GO:1902476]; cochlea development [GO:0090102]; gamma-aminobutyric acid signaling pathway [GO:0007214]; inner ear receptor cell development [GO:0060119]; innervation [GO:0060384]; ion transmembrane transport [GO:0034220]; negative regulation of ne…	140.333	13.2313	182	11.9164
XM_004940310.2	GPR6	G protein-coupled receptor 6	1.46225	G-protein coupled receptor	Plasma membrane	positive regulation of cytosolic calcium ion concentration [GO:0007204]	125.833	20.0641	184	26.9568
XM_015298772.1	GPR61	G protein-coupled receptor 61	1.35524	G-protein coupled receptor	Plasma membrane	G protein-coupled receptor signaling pathway [GO:0007186]; positive regulation of cAMP-mediated signaling [GO:0043950]	720.167	102.912	976	136.541
XM_425386.5	GPRC5C	G protein-coupled receptor, class C, group 5, member C	1.82135	G-protein coupled receptor	Plasma membrane	G protein-coupled receptor signaling pathway [GO:0007186]	456.667	68.0431	831.75	183.493
XM_004934328.2	GSC2	Goosecoid homeobox 2	1.57094	Transcription regulator	Nucleus	(1->3)-beta-D-glucan biosynthetic process [GO:0006075]; ascospore wall assembly [GO:0030476]; regulation of cell shape [GO:0008360]	218.5	36.3799	343.25	48.4862
NM_001031076.1	GTF3C6	General transcription factor IIIC, polypeptide 6, alpha 35kDa	1.42189	Transcription regulator	Nucleus	5S class rRNA transcription by RNA polymerase III [GO:0042791]; transcription by RNA polymerase III [GO:0006383]; tRNA transcription by RNA polymerase III [GO:0042797]	1722	149.328	2448.5	188.13
XR_001467357.1	GULP1	GULP, engulfment adaptor PTB domain containing 1 (misc_RNA)	1.25912	Other	Cytoplasm	Uncharacterized	68.5	5.00999	86.25	9.53502
XM_015275542.1	HECTD4	HECT domain containing E3 ubiquitin protein ligase 4	-1.21054	Other	Nucleus	glucose homeostasis [GO:0042593]; glucose metabolic process [GO:0006006]	532.333	21.0396	439.75	21.3288
XM_015290317.1	HENMT1	HEN1 methyltransferase homolog 1 (Arabidopsis)	-1.45775	Enzyme	Other	piRNA metabolic process [GO:0034587]; production of siRNA involved in RNA interference [GO:0030422]; RNA methylation [GO:0001510]	130.833	15.2239	89.75	13.1498
XM_015274427.1	HGH1	HGH1 homolog (partial mRNA)	1.32893	Other	Other	Uncharacterized	220.667	16.0208	293.25	40.0198
XM_015277490.1	HINT2	Histidine triad nucleotide binding protein 2	1.48065	Other	Cytoplasm	apoptotic process [GO:0006915]; lipid catabolic process [GO:0016042]; negative regulation of peptidyl-lysine acetylation [GO:2000757]; steroid biosynthetic process [GO:0006694]	4663.17	646.682	6904.5	896.672
NM_001079475.1	HIST1H2A4	Histone cluster 1, H2A, IV (similar to human histone cluster 2, class H2A, member C)	1.33086	Uncharacterized	Uncharacterized	Uncharacterized	8525.5	758.112	11346.2	1637.63
XM_015293696.1	IFFO1	Intermediate filament family orphan 1	1.21654	Other	Other	Uncharacterized	1977.33	84.4859	2405.5	292.084
XM_015277668.1	IL1RL1	Interleukin 1 receptor-like 1	-1.66551	Transmembrane receptor	Plasma membrane	immune response [GO:0006955]; interleukin-33-mediated signaling pathway [GO:0038172]; negative regulation of interferon-gamma production [GO:0032689]; negative regulation of T-helper 1 type immune response [GO:0002826]; positive regulation of chemokine secretion [GO:0090197]; positive regulation of inflammatory response [GO:0050729]; positive regulation of interleukin-5 production [GO:0032754]; p…	120.333	24.246	72.25	14.3149
XM_015284737.1	IMPG1	Interphotoreceptor matrix proteoglycan 1	-1.52193	Other	Extracellular space	visual perception [GO:0007601]	57.8333	7.38692	38	4.96655
XM_015299422.1	ITGA3	Integrin, alpha 3 (antigen CD49C, alpha 3 subunit of VLA-3 receptor)	1.48116	Other	Plasma membrane	cell-matrix adhesion [GO:0007160]; dendritic spine maintenance [GO:0097062]; exploration behavior [GO:0035640]; extracellular matrix organization [GO:0030198]; heart development [GO:0007507]; integrin-mediated signaling pathway [GO:0007229]; leukocyte migration [GO:0050900]; lung development [GO:0030324]; maternal process involved in female pregnancy [GO:0060135]; memory [GO:0007613]; mesodermal …	862.333	222.078	1277.25	189.294
XM_015293351.1	JAGN1	Jagunal homolog 1	1.30953	Other	Cytoplasm	cellular response to tunicamycin [GO:1904577]; defense response to fungus [GO:0050832]; endoplasmic reticulum organization [GO:0007029]; exocytosis [GO:0006887]; granulocyte colony-stimulating factor signaling pathway [GO:0038158]; negative regulation of insulin secretion involved in cellular response to glucose stimulus [GO:0061179]; neutrophil differentiation [GO:0030223]; neutrophil mediated i…	811.167	53.5254	1062.25	130.633
XM_015284070.1	KATNA1	Katanin p60 (ATPase containing) subunit A 1	-1.20431	Enzyme	Cytoplasm	cell cycle [GO:0007049]; cell division [GO:0051301]; cytoplasmic microtubule organization [GO:0031122]	511.833	43.6138	425	28.4371
XM_015280209.1	KDM4C	Lysine (K)-specific demethylase 4C	-1.34623	Enzyme	Nucleus	negative regulation of histone H3-K9 trimethylation [GO:1900113]; positive regulation of cell proliferation [GO:0008284]; regulation of stem cell differentiation [GO:2000736]; regulation of stem cell population maintenance [GO:2000036]	174	13.8996	129.25	18.1177
XM_015280441.1	KIAA1731	KIAA1731 ortholog	-1.295	Uncharacterized	Cytoplasm	positive regulation of centriole elongation [GO:1903724]; positive regulation of centrosome duplication [GO:0010825]; positive regulation of establishment of protein localization [GO:1904951]; positive regulation of protein acetylation [GO:1901985]	489.833	37.8175	378.25	48.0512
XM_015277094.1	KIF1A	Kinesin family member 1A	1.41667	Other	Cytoplasm	anterograde axonal transport [GO:0008089]; anterograde neuronal dense core vesicle transport [GO:1990048]; cytoskeleton-dependent intracellular transport [GO:0030705]; interkinetic nuclear migration [GO:0022027]; microtubule-based movement [GO:0007018]; protein transport along microtubule [GO:0098840]; retrograde neuronal dense core vesicle transport [GO:1990049]; vesicle-mediated transport [GO:0…	51	2.60768	72.25	9.94568
XM_428850.5	KRT75L2	768880 KRT75L1 keratin, type II cytoskeletal 75-like 2	1.31769	Uncharacterized	Keratin filament	Uncharacterized	138.5	16.5015	182.5	15.7797
XM_015298727.1	LGR6	Leucine-rich repeat containing G protein-coupled receptor 6	1.47103	G-protein coupled receptor	Plasma membrane	bone regeneration [GO:1990523]; G protein-coupled receptor signaling pathway [GO:0007186]; positive regulation of canonical Wnt signaling pathway [GO:0090263]; positive regulation of cell migration [GO:0030335]; positive regulation of Wnt signaling pathway [GO:0030177]; Wnt signaling pathway [GO:0016055]	353.833	52.4878	520.5	68.9758
XM_015302264.1	LOC100857331	Tapasin-related protein-like	1.49371	Uncharacterized	Uncharacterized	Uncharacterized	477.167	43.3471	712.75	63.2528
XM_015284986.1	LOC100857732	Microtubule-associated protein RP/EB family member 3-like	1.40889	Uncharacterized	Uncharacterized	Uncharacterized	573.5	66.947	808	101.571
XM_015297505.1	LOC100858617	Cytosolic purine 5'-nucleotidase-like	1.59928	Uncharacterized	Uncharacterized	Uncharacterized	1850.83	249.219	2960	433.837
XR_001466927.1	LOC100858688	Uncharacterized LOC100858688 (ncRNA)	1.49523	Uncharacterized	Uncharacterized	Uncharacterized	1258	148.216	1881	291.311
XM_015282044.1	LOC100859434	Uncharacterized LOC100859434	-1.58368	Uncharacterized	Uncharacterized	Uncharacterized	93.8333	12.2543	59.25	2.62996
XM_015275055.1	LOC101747278	ATP-dependent DNA helicase Q4-like	1.24202	Uncharacterized	Uncharacterized	Uncharacterized	120.167	8.01041	149.25	12.0934
XM_015279683.1	LOC101747382	Collagen alpha-1(II) chain-like	1.52893	Uncharacterized	Uncharacterized	Uncharacterized	60.5	9.50263	92.5	12.3962
XM_015274474.1	LOC101747546	Spectrin beta chain, non-erythrocytic 4-like (partial mRNA)	1.31517	Uncharacterized	Uncharacterized	Uncharacterized	3116.33	278.819	4098.5	396.658
XR_001465534.1	LOC101748087	Uncharacterized LOC101748087 (ncRNA)	1.66844	Uncharacterized	Uncharacterized	Uncharacterized	109.833	25.3094	183.25	18.4097
XR_001467052.1	LOC101749147	Uncharacterized LOC101749147 (ncRNA)	-1.21136	Uncharacterized	Uncharacterized	Uncharacterized	266.5	34.3147	220	10.0995
XR_001466263.1	LOC101749696	Uncharacterized LOC101749696 (misc_RNA)	1.71265	Uncharacterized	Uncharacterized	Uncharacterized	656	115.248	1123.5	157.807
XM_015274365.1	LOC101750560	Uncharacterized LOC101750560 (partial mRNA)	1.43583	Uncharacterized	Uncharacterized	Uncharacterized	2555.83	367.115	3669.75	539.727
XM_015293602.1	LOC101750805	Basic proline-rich protein-like	1.31088	Uncharacterized	Uncharacterized	Uncharacterized	4088.67	392.089	5359.75	208.607
XM_015273624.1	LOC101751023	Isocitrate dehydrogenase [NAD] subunit gamma, mitochondrial-like	1.33828	Uncharacterized	Uncharacterized	Uncharacterized	1337.17	129.051	1789.5	59.3998
XR_001469825.1	LOC101751371	Uncharacterized LOC101751371 (ncRNA)	1.67519	Uncharacterized	Uncharacterized	Uncharacterized	149.833	27.8454	251	40.2741
XR_001462196.1	LOC101752233	Uncharacterized LOC101752233 (ncRNA)	1.3837	Uncharacterized	Uncharacterized	Uncharacterized	105.333	7.84007	145.75	10.9049
XR_001462302.1	LOC107049161	Uncharacterized protein C19orf47 homolog (misc_RNA)	1.50708	Uncharacterized	Uncharacterized	Uncharacterized	705.833	84.5752	1063.75	155.476
XM_015272562.1	LOC107049239	Olfactory receptor 14A16-like (partial mRNA)	1.50512	Uncharacterized	Uncharacterized	G protein-coupled receptor signaling pathway [GO:0007186]; sensory perception of smell [GO:0007608]	48.8333	10.9621	73.5	4.20317
XM_015272587.1	LOC107049255	Proline-rich protein 36-like	1.48677	Uncharacterized	Uncharacterized	Uncharacterized	264.5	44.4106	393.25	51.0384
XM_015273265.1	LOC107049545	Cytochrome c oxidase subunit 5B, mitochondrial	2.06136	Uncharacterized	Uncharacterized	mitochondrial ATP synthesis coupled proton transport [GO:0042776]; mitochondrial electron transport, cytochrome c to oxygen [GO:0006123]	1150.33	172.595	2371.25	707.714
XM_015273280.1	LOC107049555	Translation initiation factor IF-2-like	1.25325	Uncharacterized	Uncharacterized	Uncharacterized	423.5	46.7451	530.75	48.6578
XM_015273425.1	LOC107049670	Uncharacterized LOC107049670	1.68112	Uncharacterized	Uncharacterized	Uncharacterized	303.667	59.1766	510.5	63.2535
XM_015273432.1	LOC107049673	Glucosylceramidase-like	1.39147	Uncharacterized	Uncharacterized	Uncharacterized	2116.83	132.261	2945.5	405.332
XR_001462120.1	LOC107049776	Uncharacterized LOC107049776 (ncRNA)	1.61538	Uncharacterized	Uncharacterized	Uncharacterized	166.833	24.8066	269.5	43.1007
XM_015273715.1	LOC107049916	Uncharacterized LOC107049916	1.42649	Uncharacterized	Uncharacterized	Uncharacterized	1091.67	94.4895	1557.25	133.05
XR_001462269.1	LOC107049954	Uncharacterized LOC107049954 (ncRNA)	1.75551	Uncharacterized	Uncharacterized	Uncharacterized	340.5	88.437	597.75	119.692
XR_001462358.1	LOC107050053	Uncharacterized LOC107050053 (ncRNA)	1.28039	Uncharacterized	Uncharacterized	Uncharacterized	503.167	74.4941	644.25	46.4354
XR_001462548.1	LOC107050345	Uncharacterized LOC107050345 (ncRNA)	1.55023	Uncharacterized	Uncharacterized	Uncharacterized	184.167	27.066	285.5	36.4097
XR_001462559.1	LOC107050367	Uncharacterized LOC107050367 (ncRNA)	1.87573	Uncharacterized	Uncharacterized	Uncharacterized	85.1667	11.4441	159.75	40.9013
XR_001462596.1	LOC107050434	Uncharacterized LOC107050434 (ncRNA)	1.32428	Uncharacterized	Uncharacterized	Uncharacterized	374.167	38.2749	495.5	51.2543
XM_015274210.1	LOC107050460	Single-stranded DNA-binding protein 4-like	1.45243	Uncharacterized	Uncharacterized	Uncharacterized	294.333	56.1415	427.5	40.0708
XR_001462651.1	LOC107050537	Uncharacterized LOC107050537 (ncRNA)	1.38403	Uncharacterized	Uncharacterized	Uncharacterized	295.333	43.1494	408.75	36.0867
XM_015274297.1	LOC107050573	Translation initiation factor IF-2-like	1.39752	Uncharacterized	Uncharacterized	Uncharacterized	1744.17	114.601	2437.5	361.962
XM_015274350.1	LOC107050638	Vinexin-like	1.25797	Uncharacterized	Uncharacterized	Uncharacterized	2891.17	278.287	3637	289.131
XM_015274461.1	LOC107050755	Pulmonary surfactant-associated protein B-like	1.59823	Uncharacterized	Uncharacterized	Uncharacterized	565	54.4537	903	120.313
XM_015274495.1	LOC107050778	CD82 antigen-like	1.72716	Uncharacterized	Uncharacterized	Uncharacterized	799	149.932	1380	409.894
XR_001462780.1	LOC107050806	Uncharacterized LOC107050806 (ncRNA)	1.25229	Uncharacterized	Uncharacterized	Uncharacterized	23863	631.203	29883.5	1514.11
XM_015274724.1	LOC107051030	General transcription factor IIF subunit 1-like (partial mRNA)	2.10236	Uncharacterized	Uncharacterized	Uncharacterized	42.3333	7.33939	89	36.3226
XM_015274791.1	LOC107051120	Cyclin-related protein FAM58A-like (partial mRNA)	1.32246	Uncharacterized	Uncharacterized	Uncharacterized	414	36.8185	547.5	53.7928
XM_015274825.1	LOC107051172	Astrocytic phosphoprotein PEA-15-like (partial mRNA)	1.30537	Uncharacterized	Uncharacterized	Uncharacterized	403.333	47.748	526.5	41.4206
XR_001463033.1	LOC107051229	Uncharacterized LOC107051229 (ncRNA)	1.56	Uncharacterized	Uncharacterized	Uncharacterized	41.6667	3.88158	65	14.2127
XR_001463056.1	LOC107051285	Uncharacterized LOC107051285 (ncRNA)	1.3913	Uncharacterized	Uncharacterized	Uncharacterized	759	81.8486	1056	182.985
XM_015275019.1	LOC107051420	Vegetative cell wall protein gp1-like (partial mRNA)	1.31147	Uncharacterized	Uncharacterized	Uncharacterized	848.667	116.783	1113	113.713
XM_015275057.1	LOC107051451	V-type proton ATPase subunit B-like	1.27435	Uncharacterized	Uncharacterized	Uncharacterized	675.833	49.3535	861.25	159.675
XM_015275107.1	LOC107051543	Transmembrane protein 98-like (partial mRNA)	1.65059	Uncharacterized	Uncharacterized	Uncharacterized	468.167	118.429	772.75	151.24
XM_015275129.1	LOC107051572	Uncharacterized LOC107051572	1.32661	Uncharacterized	Uncharacterized	Uncharacterized	1351	109.902	1792.25	64.9224
XR_001463901.1	LOC107051920	Uncharacterized LOC107051920 (ncRNA)	1.55899	Uncharacterized	Uncharacterized	Uncharacterized	29.6667	3.55903	46.25	6.34429
XR_001464170.1	LOC107052050	Uncharacterized LOC107052050 (ncRNA)	-1.529	Uncharacterized	Uncharacterized	Uncharacterized	217.5	29.4534	142.25	15.6498
XR_001464286.1	LOC107052114	Uncharacterized LOC107052114 (ncRNA)	1.4698	Uncharacterized	Uncharacterized	Uncharacterized	149	22.1901	219	19.5448
XR_001464602.1	LOC107052244	Uncharacterized LOC107052244 (ncRNA)	1.59945	Uncharacterized	Uncharacterized	Uncharacterized	30.1667	4.53505	48.25	3.20156
XR_001464669.1	LOC107052274	Uncharacterized LOC107052274 (ncRNA)	1.55091	Uncharacterized	Uncharacterized	Uncharacterized	73.6667	8.47742	114.25	9.21502
XR_001464679.1	LOC107052283	Uncharacterized LOC107052283 (ncRNA)	1.53261	Uncharacterized	Uncharacterized	Uncharacterized	46	4.73286	70.5	11.6189
XR_001465193.1	LOC107052601	Uncharacterized LOC107052601 (ncRNA)	1.53846	Uncharacterized	Uncharacterized	Uncharacterized	65	8.6487	100	10.4243
XM_015283418.1	LOC107052850	heme-binding protein 1-like	1.78657	Uncharacterized	Uncharacterized	Uncharacterized	335	40.487	598.5	130.48
XR_001465778.1	LOC107052939	Uncharacterized LOC107052939 (ncRNA)	-1.47595	Uncharacterized	Uncharacterized	Uncharacterized	143.167	16.0052	97	18.7617
XR_001467495.1	LOC107053817	Uncharacterized LOC107053817 (ncRNA)	1.55229	Uncharacterized	Uncharacterized	Uncharacterized	215.167	26.7688	334	71.7542
XR_001467791.1	LOC107053961	Uncharacterized LOC107053961 (ncRNA)	1.49057	Uncharacterized	Uncharacterized	Uncharacterized	53	8.69483	79	3.3665
XM_015292179.1	LOC107054221	Peptidyl-prolyl cis-trans isomerase FKBP8-like	1.75274	Uncharacterized	Uncharacterized	Uncharacterized	197.833	31.8648	346.75	32.9684
XR_001468433.1	LOC107054291	Uncharacterized LOC107054291 (ncRNA)	1.4929	Uncharacterized	Uncharacterized	Uncharacterized	7011.83	593.792	10468	479.734
XM_015293354.1	LOC107054430	Uncharacterized LOC107054430	1.40909	Uncharacterized	Uncharacterized	Uncharacterized	390.5	30.7555	550.25	73.4229
XR_001468775.1	LOC107054492	Uncharacterized LOC107054492 (ncRNA)	1.26552	Uncharacterized	Uncharacterized	Uncharacterized	77.8333	6.11283	98.5	6.80686
XR_001469705.1	LOC107054891	Uncharacterized LOC107054891 (ncRNA)	1.54781	Uncharacterized	Uncharacterized	Uncharacterized	41.8333	7.60044	64.75	5.85235
XM_015297718.1	LOC107055016	transcription elongation factor A protein 3-like	1.67797	Uncharacterized	Uncharacterized	Uncharacterized	39.3333	9.45868	66	9.34523
XR_001470108.1	LOC107055113	Uncharacterized LOC107055113 (ncRNA)	1.34192	Uncharacterized	Uncharacterized	Uncharacterized	145.5	21.1825	195.25	26.1709
XM_015299240.1	LOC107055264	Feather keratin Cos1-1/Cos1-3/Cos2-1-like	1.68711	Uncharacterized	Uncharacterized	Uncharacterized	4158	471.714	7015	1039.73
XM_015299248.1	LOC107055267	Feather keratin Cos1-1/Cos1-3/Cos2-1-like	1.72109	Uncharacterized	Uncharacterized	Uncharacterized	4084.33	553.038	7029.5	1182.61
XM_015299419.1	LOC107055280	Merozoite surface protein CMZ-8-like	1.65982	Uncharacterized	Uncharacterized	Uncharacterized	588.167	137.102	976.25	227.854
XM_015299983.1	LOC107055353	Uncharacterized LOC107055353	1.62705	Uncharacterized	Uncharacterized	Uncharacterized	192.833	30.9284	313.75	18.1177
XR_001470554.1	LOC107055491	Uncharacterized LOC107055491 (ncRNA)	1.34672	Uncharacterized	Uncharacterized	Uncharacterized	495.833	44.683	667.75	94.5846
XM_015300758.1	LOC107055590	collagen alpha-1(I) chain-like	1.81112	Uncharacterized	Uncharacterized	Uncharacterized	9812.17	2892.41	17771	3062.65
XR_001470610.1	LOC107055626	Uncharacterized LOC107055626 (ncRNA)	1.49811	Uncharacterized	Uncharacterized	Uncharacterized	1720.5	234.025	2577.5	318.669
XR_001470625.1	LOC107055653	Uncharacterized LOC107055653 (ncRNA)	1.67176	Uncharacterized	Uncharacterized	Uncharacterized	3052.17	228.233	5102.5	1452.94
XM_015300814.1	LOC107055658	Collagen alpha-1(I) chain-like	1.38834	Uncharacterized	Uncharacterized	Uncharacterized	1997.17	193.091	2772.75	233.569
XM_015300860.1	LOC107055735	Basic proline-rich protein-like (partial mRNA)	1.32105	Uncharacterized	Uncharacterized	Uncharacterized	3295.67	236.304	4353.75	404.591
XR_001470776.1	LOC107055959	Uncharacterized LOC107055959 (ncRNA)	1.398	Uncharacterized	Uncharacterized	Uncharacterized	41.6667	4.27395	58.25	9.67385
XM_015301321.1	LOC107056272	Translation initiation factor IF-2-like	1.76224	Uncharacterized	Uncharacterized	Uncharacterized	47.6667	17.0372	84	10.6771
XR_001470925.1	LOC107056274	Rho-related BTB domain-containing protein 2-like (misc_RNA)	1.48548	Uncharacterized	Uncharacterized	small GTPase mediated signal transduction [GO:0007264]	51.6667	8.06639	76.75	7.5
XR_001470964.1	LOC107056330	Uncharacterized LOC107056330 (ncRNA)	1.31433	Uncharacterized	Uncharacterized	Uncharacterized	171	18.6655	224.75	17.0758
XM_015301553.1	LOC107056518	Uncharacterized LOC107056518 (partial mRNA)	1.34795	Uncharacterized	Uncharacterized	Uncharacterized	243.333	21.3041	328	50.774
XM_015301869.1	LOC107056904	Protocadherin beta-15-like	1.24436	Uncharacterized	Uncharacterized	Uncharacterized	66.5	3.56371	82.75	2.87228
XR_001471266.1	LOC107057040	Uncharacterized LOC107057040 (ncRNA)	1.37542	Uncharacterized	Uncharacterized	Uncharacterized	50.1667	9.02035	69	8.04156
XM_015302178.1	LOC107057153	N-acetyltransferase 9-like	1.76362	Uncharacterized	Uncharacterized	Uncharacterized	691.333	102.06	1219.25	122.921
XM_015302634.1	LOC107057550	Feather keratin Cos1-1/Cos1-3/Cos2-1-like	1.31496	Uncharacterized	Uncharacterized	Uncharacterized	63.5	3.83406	83.5	8.81287
XM_015275484.1	LOC416916	Solute carrier family 2, facilitated glucose transporter member 11-like	-1.24167	Uncharacterized	Uncharacterized	Uncharacterized	149	9.73653	120	7.52773
XM_015283412.1	LOC421255	Cullin-9-like	1.20235	Uncharacterized	Uncharacterized	Uncharacterized	575.333	29.2757	691.75	64.9429
XM_015291285.1	LOC424588	E3 ubiquitin-protein ligase HECTD3-like	1.33644	Uncharacterized	Uncharacterized	Uncharacterized	392.833	55.9908	525	54.2771
XM_015275502.1	LOC427700	Sodium-dependent serotonin transporter-like	1.67881	Uncharacterized	Uncharacterized	Uncharacterized	50.3333	9.4163	84.5	13.6991
XM_015295034.1	LOC768349	Myelin-oligodendrocyte glycoprotein-like	1.66046	Uncharacterized	Uncharacterized	Uncharacterized	353.667	59.1901	587.25	98.1202
XM_004935048.2	LOC768477	Uncharacterized LOC768477	1.37354	Uncharacterized	Uncharacterized	Uncharacterized	199.667	27.0826	274.25	38.6555
XM_015299787.1	LOC769223	Complexin-3-like	1.38491	Uncharacterized	Uncharacterized	regulation of neurotransmitter secretion [GO:0046928]; synaptic vesicle exocytosis [GO:0016079]	3104.17	727.177	4299	266.182
XM_015296191.1	LOC772360	Uncharacterized LOC772360	1.47511	Uncharacterized	Uncharacterized	Uncharacterized	522.333	49.3018	770.5	76.0592
NM_001199668.1	LRRC57	Leucine rich repeat containing 57	-1.22416	Other	Cytoplasm	Uncharacterized	771.833	58.2389	630.5	36.6288
XM_015293939.1	LTC4SL	Leukotriene C4 synthase-like	1.56324	Uncharacterized	Plasma membrane	leukotriene biosynthetic process [GO:0019370]	154.167	14.8784	241	42.8719
XM_015284419.1	LYST	Lysosomal trafficking regulator	-1.24934	Transporter	Cytoplasm	leucine biosynthetic process [GO:0009098]; lysine biosynthetic process via aminoadipic acid [GO:0019878]	552.833	48.2801	442.5	58.9943
XM_015298770.1	LZTR1	Leucine-zipper-like transcription regulator 1 (partial mRNA)	1.25172	Transcription regulator	Cytoplasm	anatomical structure morphogenesis [GO:0009653]	315.167	18.6699	394.5	26.839
XM_015288757.1	LZTS2	Leucine zipper, putative tumor suppressor 2	1.44331	Other	Cytoplasm	kidney development [GO:0001822]; microtubule severing [GO:0051013]; mitotic cytokinesis [GO:0000281]; negative regulation of canonical Wnt signaling pathway [GO:0090090]; negative regulation of cell proliferation [GO:0008285]; negative regulation of protein localization to nucleus [GO:1900181]; nuclear export [GO:0051168]; spindle midzone assembly [GO:0051255]; Wnt signaling pathway [GO:0016055]	211.667	35.0238	305.5	15
XM_015287162.1	MADD	MAP-kinase activating death domain	-1.44101	Other	Cytoplasm	cellular carbohydrate metabolic process [GO:0044262]	606.667	147.214	421	16.5126
XM_015295428.1	MAFG	V-maf avian musculoaponeurotic fibrosarcoma oncogene homolog G	1.35824	Transcription regulator	Nucleus	adult behavior [GO:0030534]; regulation of cell proliferation [GO:0042127]; regulation of epidermal cell differentiation [GO:0045604]	227.5	16.4773	309	36.5148
XM_015293275.1	MAGI1	Membrane associated guanylate kinase, WW and PDZ domain containing 1	-1.45305	Kinase	Plasma membrane	cell adhesion [GO:0007155]; cell surface receptor signaling pathway [GO:0007166]; protein-containing complex assembly [GO:0065003]	309.5	39.3484	213	39.9082
XM_015298690.1	MGAT4C	Mannosyl (alpha-1,3-)-glycoprotein beta-1,4-N-acetylglucosaminyltransferase, isozyme C (putative)	1.34713	Enzyme	Cytoplasm	protein glycosylation [GO:0006486]	26.1667	1.47196	35.25	4.34933
XM_015275587.1	MORN3	MORN repeat containing 3	1.26482	Other	Nucleus	Uncharacterized	87.1667	8.79583	110.25	7.97392
XM_015273242.1	MOSPD2	Motile sperm domain containing 2	-1.3319	Other	Plasma membrane	chemotaxis [GO:0006935]; neutrophil degranulation [GO:0043312]; positive regulation of monocyte chemotaxis [GO:0090026]; positive regulation of neutrophil chemotaxis [GO:0090023]	309.667	22.0424	232.5	25.04
XM_015282880.1	MSC	Musculin	-1.43292	Transcription regulator	Cytoplasm	branchiomeric skeletal muscle development [GO:0014707]; cellular response to leukemia inhibitory factor [GO:1990830]; roof of mouth development [GO:0060021]	2203.83	577.694	1538	120.424
XM_015278118.1	MSH6	MutS homolog 6	-1.51131	Enzyme	Nucleus	determination of adult lifespan [GO:0008340]; DNA repair [GO:0006281]; interstrand cross-link repair [GO:0036297]; intrinsic apoptotic signaling pathway [GO:0097193]; intrinsic apoptotic signaling pathway in response to DNA damage [GO:0008630]; isotype switching [GO:0045190]; maintenance of DNA repeat elements [GO:0043570]; meiotic mismatch repair [GO:0000710]; mismatch repair [GO:0006298]; mitot…	3652.83	596.523	2417	261.206
XM_003642151.3	MSS51	MSS51 mitochondrial translational activator	1.63242	Enzyme	Other	social behavior [GO:0035176]	1929.5	320.582	3149.75	729.137
XM_015278244.1	MST4	Serine/threonine protein kinase MST4	-1.27575	Uncharacterized	Cell periphery	activation of protein kinase activity [GO:0032147]; apoptotic process [GO:0006915]; cellular response to starvation [GO:0009267]; MAPK cascade [GO:0000165]; microvillus assembly [GO:0030033]; negative regulation of cell migration [GO:0030336]; neuron projection morphogenesis [GO:0048812]; protein autophosphorylation [GO:0046777]; protein phosphorylation [GO:0006468]; regulation of apoptotic proce…	4449.17	180.743	3487.5	255.526
XM_015278987.1	MTMR10	Myotubularin related protein 10	1.32703	Other	Cytoplasm	Uncharacterized	260.167	30.0627	345.25	55.9188
XM_015281121.1	NACAD	NAC alpha domain containing	1.45995	Other	Other	protein transport [GO:0015031]	680.333	85.7617	993.25	107.587
XM_015289933.1	NCKAP5	NCK-associated protein 5	-1.36097	Other	Other	microtubule bundle formation [GO:0001578]; microtubule depolymerization [GO:0007019]	65.6667	7.55425	48.25	3.68556
NM_001006504.1	NHLRC2	NHL repeat containing 2	1.33333	Enzyme	Other	cell redox homeostasis [GO:0045454]; platelet degranulation [GO:0002576]	415.5	39.6371	554	31.57
XM_015294737.1	NHLRC4	NHL repeat containing 4	1.375	Other	Other	Uncharacterized	50	8.87694	68.75	4.19325
XM_015281154.1	NOS3	Endothelial nitric oxide synthase 3	1.3508	Enzyme	Cytoplasm	angiogenesis [GO:0001525]; aortic valve morphogenesis [GO:0003180]; arginine catabolic process [GO:0006527]; blood vessel remodeling [GO:0001974]; cell redox homeostasis [GO:0045454]; cofactor metabolic process [GO:0051186]; endocardial cushion morphogenesis [GO:0003203]; endothelial cell migration [GO:0043542]; homeostasis of number of cells within a tissue [GO:0048873]; in utero embryonic devel…	93.8333	10.6097	126.75	3.5
XM_414750.5	NPTX2	Neuronal pentraxin II	-2.49885	Other	Extracellular space	associative learning [GO:0008306]; chemical synaptic transmission [GO:0007268]; neuron projection development [GO:0031175]; regulation of postsynaptic neurotransmitter receptor activity [GO:0098962]	451.667	183.658	180.75	55.476
XM_004944725.2	NR2C2	Nuclear receptor subfamily 2, group C, member 2	-1.34267	Ligand-dependent nuclear receptor	Nucleus	Uncharacterized	191.667	11.8265	142.75	22.3812
XM_015280952.1	NUP98	Nucleoporin 98kDa	1.63383	Transporter	Nucleus	DNA replication [GO:0006260]; nuclear pore complex assembly [GO:0051292]; positive regulation of mRNA splicing, via spliceosome [GO:0048026]; posttranscriptional tethering of RNA polymerase II gene DNA at nuclear periphery [GO:0000973]; protein import into nucleus [GO:0006606]; RNA export from nucleus [GO:0006405]; telomere tethering at nuclear periphery [GO:0034398]	627.667	112.839	1025.5	188.988
NM_001030658.1	ORAI1	ORAI calcium release-activated calcium modulator 1	1.35736	Ion channel	Plasma membrane	adaptive immune response [GO:0002250]; positive regulation of calcium ion transport [GO:0051928]; store-operated calcium entry [GO:0002115]	1556.33	211.54	2112.5	179.805
XM_004943581.2	P2RY13	Purinergic receptor P2Y, G-protein coupled, 13	1.28061	G-protein coupled receptor	Plasma membrane	cellular response to organic cyclic compound [GO:0071407]; G protein-coupled receptor signaling pathway [GO:0007186]; negative regulation of adenylate cyclase activity [GO:0007194]	503.667	45.023	645	43.7493
XM_015293317.1	P4HTM	Prolyl 4-hydroxylase, transmembrane (endoplasmic reticulum)	1.77312	Enzyme	Cytoplasm	peptidyl-proline hydroxylation to 4-hydroxy-L-proline [GO:0018401]; regulation of erythrocyte differentiation [GO:0045646]	234.333	31.7406	415.5	110.823
NM_205043.1	PADI3	Peptidyl arginine deiminase, type III	1.5752	Enzyme	Cytoplasm	histone citrullination [GO:0036414]; protein citrullination [GO:0018101]	372.333	54.1098	586.5	67.3721
XM_015289211.1	PCNT	Pericentrin	-1.22382	Other	Cytoplasm	ciliary basal body-plasma membrane docking [GO:0097711]; cilium assembly [GO:0060271]; G2/M transition of mitotic cell cycle [GO:0000086]; microtubule cytoskeleton organization [GO:0000226]; mitotic spindle organization [GO:0007052]; positive regulation of intracellular protein transport [GO:0090316]; regulation of G2/M transition of mitotic cell cycle [GO:0010389]; signal transduction [GO:000716…	212.333	10.5388	173.5	11.2101
XM_004940343.2	PDSS2	Prenyl (decaprenyl) diphosphate synthase, subunit 2	-1.30454	Enzyme	Cytoplasm	isoprenoid biosynthetic process [GO:0008299]; protein heterotetramerization [GO:0051290]; regulation of body fluid levels [GO:0050878]; ubiquinone biosynthetic process [GO:0006744]	98.1667	17.5774	75.25	8.77022
NM_001007831.1	PHKB	Phosphorylase kinase, beta	-1.50258	Kinase	Cytoplasm	glycogen metabolic process [GO:0005977]	6201.17	965.334	4127	386.826
XM_015292693.1	PHLPP2	PH domain and leucine rich repeat protein phosphatase 2	-1.23317	Enzyme	Cytoplasm	protein dephosphorylation [GO:0006470]	447.333	30.6115	362.75	45.0361
XM_004934998.2	PHTF1	Putative homeodomain transcription factor 1	-1.31275	Transcription regulator	Nucleus	Uncharacterized	223.167	20.4296	170	21.6487
XM_015293986.1	PITX1	Paired-like homeodomain 1	1.42023	Transcription regulator	Nucleus	anatomical structure morphogenesis [GO:0009653]; branchiomeric skeletal muscle development [GO:0014707]; cartilage development [GO:0051216]; embryonic hindlimb morphogenesis [GO:0035116]; myoblast fate commitment [GO:0048625]; negative regulation of transcription, DNA-templated [GO:0045892]; pituitary gland development [GO:0021983]; skeletal system development [GO:0001501]	12360.7	1499.02	17555	683.336
XM_015286632.1	PLEKHA7	Pleckstrin homology domain containing, family A member 7	-1.34194	Other	Cytoplasm	cell-cell adhesion mediated by cadherin [GO:0044331]; epithelial cell-cell adhesion [GO:0090136]; zonula adherens maintenance [GO:0045218]	104	5.54977	77.5	16.052
XM_015287589.1	PLEKHD1	Pleckstrin homology domain containing, family D (with coiled-coil domains) member 1	1.23913	Other	Other	Uncharacterized	42.1667	3.86868	52.25	2.62996
XM_004947868.2	PPIE	Peptidylprolyl isomerase E (cyclophilin E)	1.20028	Enzyme	Nucleus	protein folding [GO:0006457]	3866.17	143.906	4640.5	349.649
XM_015287356.1	PRKD1	Protein kinase D1	-1.29807	Kinase	Cytoplasm	intracellular signal transduction [GO:0035556]	797.667	100.542	614.5	58.1979
XM_004937025.2	PRR19	Formin-like protein 20-like	1.29931	Other	Other	Uncharacterized	769.833	90.848	1000.25	144.788
XM_004941549.2	PRR5L	Proline rich 5 like	1.43409	Other	Cytoplasm	cellular response to oxidative stress [GO:0034599]; negative regulation of protein phosphorylation [GO:0001933]; negative regulation of signal transduction [GO:0009968]; positive regulation of intracellular protein transport [GO:0090316]; positive regulation of mRNA catabolic process [GO:0061014]; positive regulation of phosphatidylinositol 3-kinase signaling [GO:0014068]; positive regulation of …	2257	572.164	3236.75	360.318
NM_001277726.1	PSMB5	Proteasome (prosome, macropain) subunit, beta type, 5	1.22732	Peptidase	Cytoplasm	post-translational protein modification [GO:0043687]; proteasomal protein catabolic process [GO:0010498]; proteasomal ubiquitin-independent protein catabolic process [GO:0010499]; proteasome-mediated ubiquitin-dependent protein catabolic process [GO:0043161]; protein deubiquitination [GO:0016579]; proteolysis [GO:0006508]; response to oxidative stress [GO:0006979]; viral process [GO:0016032]	9934.83	661.574	12193.2	560.504
XM_004942358.2	PTPRE	Protein tyrosine phosphatase, receptor type, E	-1.20315	Phosphatase	Plasma membrane	negative regulation of insulin receptor signaling pathway [GO:0046627]; protein dephosphorylation [GO:0006470]	191	10.315	158.75	8.65544
XM_015282548.1	PTPRM	Protein tyrosine phosphatase, receptor type, M	-1.36905	Phosphatase	Plasma membrane	homophilic cell adhesion via plasma membrane adhesion molecules [GO:0007156]; negative regulation of angiogenesis [GO:0016525]; negative regulation of endothelial cell migration [GO:0010596]; negative regulation of endothelial cell proliferation [GO:0001937]; neuron projection development [GO:0031175]; positive regulation of blood vessel diameter [GO:0097755]; protein dephosphorylation [GO:000647…	38.3333	2.65832	28	5.47723
XM_015296872.1	PUSL1	Pseudouridylate synthase-like 1	-1.37799	Enzyme	Other	tRNA pseudouridine synthesis [GO:0031119]	282.833	42.6447	205.25	26.3106
NM_001030669.2	RAB35	RAB35, member RAS oncogene family	-1.2243	Enzyme	Cytoplasm	antigen processing and presentation [GO:0019882]; endocytic recycling [GO:0032456]; intracellular protein transport [GO:0006886]; mitotic cytokinesis [GO:0000281]; neuron projection development [GO:0031175]; plasma membrane to endosome transport [GO:0048227]; protein localization to endosome [GO:0036010]; Rab protein signal transduction [GO:0032482]	2811	239.5	2296	44.0681
XM_015290300.1	RABGAP1L	RAB GTPase activating protein 1-like	1.5839	Other	Cytoplasm	activation of GTPase activity [GO:0090630]; endocytosis [GO:0006897]; intracellular protein transport [GO:0006886]	2792.17	148.872	4422.5	1474.41
XR_001464572.1	RALGPS1	Ral GEF with PH domain and SH3 binding motif 1 (misc_RNA)	1.53981	Other	Cytoplasm	intracellular signal transduction [GO:0035556]; regulation of Ral protein signal transduction [GO:0032485]; small GTPase mediated signal transduction [GO:0007264]	295.167	31.3651	454.5	44.155
XM_015299597.1	RAMP2	Receptor (G protein-coupled) activity modifying protein 2	1.36924	Transporter	Plasma membrane	adenylate cyclase-activating G protein-coupled receptor signaling pathway [GO:0007189]; adherens junction assembly [GO:0034333]; adrenomedullin receptor signaling pathway [GO:1990410]; amylin receptor signaling pathway [GO:0097647]; angiogenesis [GO:0001525]; basement membrane assembly [GO:0070831]; bicellular tight junction assembly [GO:0070830]; calcium ion transport [GO:0006816]; cellular resp…	198.833	27.7375	272.25	45.4414
XM_418548.5	RBM33	RNA binding motif protein 33	-1.33173	Other	Other	Uncharacterized	553.333	47.7898	415.5	37.3229
XM_004946908.2	RBM39	RNA binding motif protein 39	-1.23313	Transcription regulator	Nucleus	mRNA processing [GO:0006397]; RNA processing [GO:0006396]; RNA splicing [GO:0008380]	5088.83	95.1828	4126.75	127.571
XR_001467771.1	RFWD2	Ring finger and WD repeat domain 2, E3 ubiquitin protein ligase (misc_RNA)	1.58151	Uncharacterized	Cul4A-RING E3 ubiquitin ligase complex	positive regulation of proteasomal ubiquitin-dependent protein catabolic process [GO:0032436]; proteasome-mediated ubiquitin-dependent protein catabolic process [GO:0043161]; response to ionizing radiation [GO:0010212]	1576.5	157.147	2493.25	559.067
XM_015280899.1	RNF121	Ring finger protein 121	1.44248	Other	Other	endoplasmic reticulum unfolded protein response [GO:0030968]; ubiquitin-dependent ERAD pathway [GO:0030433]	278.167	35.3181	401.25	13.5739
XM_015280429.1	RNF170	Ring finger protein 170	-1.27576	Other	Other	Uncharacterized	1547.5	94.144	1213	106.602
XM_015286980.1	ROM1	Retinal outer segment membrane protein 1	-1.41361	Other	Plasma membrane	camera-type eye photoreceptor cell differentiation [GO:0060219]; cell adhesion [GO:0007155]; cell surface receptor signaling pathway [GO:0007166]; regulation of gene expression [GO:0010468]; retina vasculature development in camera-type eye [GO:0061298]; visual perception [GO:0007601]	789.5	49.5691	558.5	107.884
NM_001006288.1	RPN2	Ribophorin II	1.28154	Enzyme	Cytoplasm	proteasome assembly [GO:0043248]; proteasome-mediated ubiquitin-dependent protein catabolic process [GO:0043161]; regulation of protein catabolic process [GO:0042176]; ubiquitin-dependent protein catabolic process [GO:0006511]	10503.2	712.425	13460.2	843.687
XM_015287695.1	RPS6KL1	Ribosomal protein S6 kinase-like 1	1.59583	Kinase	Other	Uncharacterized	1074.83	112.826	1715.25	179.867
XM_001232147.4	RRNAD1	Ribosomal RNA adenine dimethylase domain containing 1	1.33464	Other	Other	Uncharacterized	639.5	62.8291	853.5	93.0681
NM_001012875.1	SCCPDH	Saccharopine dehydrogenase (putative)	-1.20225	Other	Cytoplasm	glycolipid biosynthetic process [GO:0009247]; platelet degranulation [GO:0002576]	2208.83	135.774	1837.25	201.174
NM_204538.2	SDK2	Sidekick cell adhesion molecule 2	1.43822	Other	Plasma membrane	Uncharacterized	72.8333	16.2162	104.75	9.94568
XM_015281149.1	SEC22C	SEC22 homolog C, vesicle trafficking protein	-1.31628	Other	Cytoplasm	ER to Golgi vesicle-mediated transport [GO:0006888]; protein transport [GO:0015031]	154.333	14.8279	117.25	15.327
XM_015276255.1	SEC31A	SEC31 homolog A (S. cerevisiae)	1.2298	Other	Cytoplasm	cargo loading into COPII-coated vesicle [GO:0090110]; COPII-coated vesicle budding [GO:0090114]; ER to Golgi vesicle-mediated transport [GO:0006888]; intracellular protein transport [GO:0006886]	1565.5	131.283	1925.25	136.165
NM_001030890.1	SERINC2	Serine incorporator 2	1.49283	Transporter	Plasma membrane	phosphatidylserine metabolic process [GO:0006658]; positive regulation of CDP-diacylglycerol-serine O-phosphatidyltransferase activity [GO:1904219]; positive regulation of serine C-palmitoyltransferase activity [GO:1904222]; sphingolipid metabolic process [GO:0006665]	209.167	31.1668	312.25	62.2756
XM_015292175.1	SERINC4	Serine incorporator 4	1.2931	Other	Other	phospholipid biosynthetic process [GO:0008654]	111.167	11.125	143.75	16.1323
XM_015288655.1	SHOC2	Soc-2 suppressor of clear homolog (C. elegans)	-1.30552	Other	Cytoplasm	positive regulation of Ras protein signal transduction [GO:0046579]; protein dephosphorylation [GO:0006470]	273.833	30.4198	209.75	20.7585
XM_015300225.1	SIRT2	Sirtuin 2	1.21585	Transcription regulator	Nucleus	autophagy [GO:0006914]; cell division [GO:0051301]; cellular lipid catabolic process [GO:0044242]; cellular response to caloric restriction [GO:0061433]; cellular response to epinephrine stimulus [GO:0071872]; cellular response to hepatocyte growth factor stimulus [GO:0035729]; cellular response to hypoxia [GO:0071456]; cellular response to molecule of bacterial origin [GO:0071219]; cellular resp…	1472.83	135.519	1790.75	84.0451
XR_001468897.1	SLC25A48	Solute carrier family 25, member 48 (misc_RNA)	1.64764	Other	Other	acyl carnitine transport [GO:0006844]	201.5	44.5006	332	73.7699
XM_015290618.1	SLC35A3	Solute carrier family 35 (UDP-N-acetylglucosamine (UDP-GlcNAc) transporter), member A3	-1.61026	Transporter	Cytoplasm	carbohydrate transport [GO:0008643]; UDP-N-acetylglucosamine metabolic process [GO:0006047]; UDP-N-acetylglucosamine transmembrane transport [GO:1990569]	52.3333	7.78888	32.5	4.43471
XM_001231468.4	SPA17	Sperm autoantigenic protein 17	1.22509	Other	Plasma membrane	binding of sperm to zona pellucida [GO:0007339]; epithelial cilium movement [GO:0003351]; single fertilization [GO:0007338]; spermatogenesis [GO:0007283]	914.833	86.5527	1120.75	93.8345
XM_419571.5	SPRTN	SprT-like N-terminal domain	-1.22608	Other	Nucleus	cellular response to DNA damage stimulus [GO:0006974]; error-free translesion synthesis [GO:0070987]; positive regulation of protein ubiquitination [GO:0031398]; response to UV [GO:0009411]; translesion synthesis [GO:0019985]	2358.67	236.803	1923.75	171.836
XM_015275119.1	SPRY2	Sprouty RTK signaling antagonist 2	-1.45884	Other	Plasma membrane	multicellular organism development [GO:0007275]; negative regulation of ERK1 and ERK2 cascade [GO:0070373]; negative regulation of fibroblast growth factor receptor signaling pathway [GO:0040037]; negative regulation of MAP kinase activity [GO:0043407]; negative regulation of Ras protein signal transduction [GO:0046580]; regulation of cell differentiation [GO:0045595]; regulation of cell prolifer…	6180	2566.57	4236.25	438.171
XM_414716.5	SPSB3	SplA/ryanodine receptor domain and SOCS box containing 3	-1.21906	Other	Cytoplasm	proteasome-mediated ubiquitin-dependent protein catabolic process [GO:0043161]; ubiquitin-dependent protein catabolic process [GO:0006511]	3865.33	358.076	3170.75	250.066
XR_001468428.1	SS18L2	Synovial sarcoma translocation gene on chromosome 18-like 2 (misc_RNA)	1.42137	Other	Other	positive regulation of dendrite morphogenesis [GO:0050775]; positive regulation of transcription, DNA-templated [GO:0045893]; positive regulation of transcription by RNA polymerase II [GO:0045944]	327.5	57.1411	465.5	55.1996
XM_015276830.1	st6gal1	ST6 beta-galactosamide alpha-2,6-sialyltranferase 1	-1.39356	Uncharacterized	Integral component of membrane	N-acetylneuraminate metabolic process [GO:0006054]; protein N-linked glycosylation via asparagine [GO:0018279]; sialylation [GO:0097503]	5391	415.292	3868.5	824.608
XM_015290295.1	STK38L	Serine/threonine kinase 38 like	-1.30075	Kinase	Cytoplasm	Uncharacterized	1736.5	101.048	1335	128.626
XM_015294321.1	SUN1	Sad1 and UNC84 domain containing 1	-1.23475	Other	Nucleus	centrosome localization [GO:0051642]; cytoskeletal anchoring at nuclear membrane [GO:0090286]; meiotic attachment of telomere to nuclear envelope [GO:0070197]; nuclear envelope organization [GO:0006998]; nuclear matrix anchoring at nuclear membrane [GO:0090292]; nucleokinesis involved in cell motility in cerebral cortex radial glia guided migration [GO:0021817]; synapsis [GO:0007129]	1283.83	82.3539	1039.75	84.5828
XM_015287591.1	SUSD6	Sushi domain containing 6	-1.36283	Other	Other	cell death [GO:0008219]; cellular response to DNA damage stimulus [GO:0006974]	5213.83	271.082	3825.75	466.793
NM_001031235.1	TAF5	TAF5 RNA polymerase II, TATA box binding protein (TBP)-associated factor, 100kDa	-1.27474	Transcription regulator	Nucleus	transcription initiation from RNA polymerase II promoter [GO:0006367]	565.667	64.7724	443.75	26.1582
XM_015300349.1	TARBP2	TAR (HIV-1) RNA binding protein 2	1.36722	Other	Nucleus	miRNA loading onto RISC involved in gene silencing by miRNA [GO:0035280]; miRNA metabolic process [GO:0010586]; multicellular organism growth [GO:0035264]; negative regulation of defense response to virus by host [GO:0050689]; negative regulation of protein kinase activity [GO:0006469]; neural precursor cell proliferation [GO:0061351]; positive regulation of muscle cell differentiation [GO:005114…	259.833	35.8687	355.25	36.7548
XM_418515.5	TBRG4	Transforming growth factor beta regulator 4	1.33266	Other	Cytoplasm	cell cycle arrest [GO:0007050]; cellular respiration [GO:0045333]; mitochondrial mRNA processing [GO:0090615]; mRNA metabolic process [GO:0016071]; positive regulation of cell proliferation [GO:0008284]; regulation of mitochondrial mRNA stability [GO:0044528]	1162.33	158.371	1549	107.403
NM_205382.1	TEF	Thyrotrophic embryonic factor	1.27759	Transcription regulator	Nucleus	positive regulation of transcription, DNA-templated [GO:0045893]; positive regulation of transcription by RNA polymerase II [GO:0045944]	637.333	52.7244	814.25	62.8404
XM_004949580.2	TEK	TEK tyrosine kinase, endothelial	-1.36852	Kinase	Plasma membrane	cell differentiation [GO:0030154]; negative regulation of angiogenesis [GO:0016525]; negative regulation of apoptotic process [GO:0043066]; negative regulation of signal transduction [GO:0009968]; positive regulation of actin cytoskeleton reorganization [GO:2000251]; positive regulation of angiogenesis [GO:0045766]; positive regulation of endothelial cell migration [GO:0010595]; positive regulati…	719.5	54.0694	525.75	85.2697
NM_001293319.1	TEX264	Testis expressed 264	1.37721	Other	Extracellular space	platelet degranulation [GO:0002576]	818.5	128.875	1127.25	47.6471
XM_015274472.1	TFPT	TCF3 (E2A) fusion partner (in childhood Leukemia) (partial mRNA)	1.32756	Other	Nucleus	apoptotic process [GO:0006915]; apoptotic signaling pathway [GO:0097190]; DNA recombination [GO:0006310]; DNA repair [GO:0006281]; protein deubiquitination [GO:0016579]	303	55.8498	402.25	25.9278
NM_001302195.1	TIMM13	Translocase of inner mitochondrial membrane 13 homolog (yeast)	1.20081	Transporter	Cytoplasm	chaperone-mediated protein transport [GO:0072321]; protein import into mitochondrial inner membrane [GO:0045039]	9859.83	826.998	11839.8	895.399
NM_001030659.1	TMEM120B	Transmembrane protein 120B	-1.21417	Other	Nucleus	fat cell differentiation [GO:0045444]; protein heterooligomerization [GO:0051291]	125.667	8.59457	103.5	10.8474
NM_001277894.1	TMEM138	Transmembrane protein 138	1.33165	Other	Extracellular space	cilium assembly [GO:0060271]	595.5	45.3464	793	136.462
XM_420732.5	TMEM33	Transmembrane protein 33	-1.22902	Other	Cytoplasm	positive regulation of IRE1-mediated unfolded protein response [GO:1903896]; positive regulation of PERK-mediated unfolded protein response [GO:1903899]; regulation of endoplasmic reticulum tubular network organization [GO:1903371]; response to endoplasmic reticulum stress [GO:0034976]	2085.33	148.952	1696.75	117.928
XM_015299413.1	TMEM98	36.4 kDa proline-rich protein-like	1.66984	Other	Cytoplasm	Uncharacterized	560.833	123.742	936.5	214.787
XM_015299827.1	TMIGD2	Transmembrane and immunoglobulin domain containing 2	1.3209	Other	Other	immune response [GO:0006955]; immunoglobulin production [GO:0002377]; positive regulation of activated T cell proliferation [GO:0042104]; positive regulation of angiogenesis [GO:0045766]; positive regulation of cytokine production [GO:0001819]; T cell costimulation [GO:0031295]	111.667	11.431	147.5	12.0139
XM_004943215.2	TOR1AIP2	Torsin A interacting protein 2	1.24209	Other	Cytoplasm	endoplasmic reticulum organization [GO:0007029]; positive regulation of ATPase activity [GO:0032781]; protein localization to nuclear envelope [GO:0090435]	1991	165.799	2473	229.88
XM_015277264.1	TPM2	Tropomyosin 2 (beta)	1.64563	Other	Other	Uncharacterized	343.333	46.9113	565	23.8048
XM_015280924.1	TPP1	Tripeptidyl peptidase I	1.40762	Peptidase	Cytoplasm	response to cold [GO:0009409]; response to salt stress [GO:0009651]; trehalose biosynthetic process [GO:0005992]	2460	94.9463	3462.75	443.446
XM_015293340.1	TTLL3	Tubulin tyrosine ligase-like family member 3	1.36658	Enzyme	Extracellular space	axoneme assembly [GO:0035082]; cilium assembly [GO:0060271]; protein polyglycylation [GO:0018094]	4866.33	982.804	6650.25	435.849
NM_204107.1	UCP3	Uncoupling protein 3 (mitochondrial, proton carrier)	-1.76212	Transporter	Cytoplasm	adaptive thermogenesis [GO:1990845]; fatty acid metabolic process [GO:0006631]; mitochondrial transmembrane transport [GO:1990542]; response to cold [GO:0009409]; response to superoxide [GO:0000303]	89828.8	11267.1	50977.8	15982.9
XM_015300099.1	USHBP1	Usher syndrome 1C binding protein 1	1.58583	Other	Other	Uncharacterized	61.1667	5.56477	97	13.7113
XM_422389.4	USP33	Ubiquitin specific peptidase 33	-1.20768	Peptidase	Cytoplasm	axon guidance [GO:0007411]; cell migration [GO:0016477]; cellular response to starvation [GO:0009267]; centrosome duplication [GO:0051298]; endocytosis [GO:0006897]; negative regulation of protein binding [GO:0032091]; positive regulation of protein binding [GO:0032092]; protein deubiquitination [GO:0016579]; protein K48-linked deubiquitination [GO:0071108]; protein K63-linked deubiquitination [G…	969.167	47.1653	802.5	64.5833
XM_416513.5	USP5	Ubiquitin specific peptidase 5 (isopeptidase T)	1.35968	Peptidase	Cytoplasm	positive regulation of proteasomal ubiquitin-dependent protein catabolic process [GO:0032436]; protein deubiquitination [GO:0016579]; protein K48-linked deubiquitination [GO:0071108]; ubiquitin-dependent protein catabolic process [GO:0006511]	746.5	76.5343	1015	135.44
NM_001039489.1	VAMP3	Vesicle-associated membrane protein 3	1.21075	Other	Plasma membrane	calcium ion regulated exocytosis [GO:0017156]; cellular response to interferon-gamma [GO:0071346]; Golgi to plasma membrane protein transport [GO:0043001]; negative regulation of secretion by cell [GO:1903531]; positive regulation of receptor recycling [GO:0001921]; retrograde transport, endosome to Golgi [GO:0042147]; SNARE complex assembly [GO:0035493]; substrate adhesion-dependent cell spreadi…	3591.17	312.232	4348	241.417
XM_015296589.1	VSTM2L	V-set and transmembrane domain containing 2 like	1.34758	Other	Extracellular space	axon guidance [GO:0007411]; dendrite self-avoidance [GO:0070593]; homophilic cell adhesion via plasma membrane adhesion molecules [GO:0007156]; negative regulation of neuron apoptotic process [GO:0043524]	651.167	49.6766	877.5	136.795
NM_001277400.1	VTI1A	Vesicle transport through interaction with t-SNAREs 1A	-1.31183	Transporter	Plasma membrane	autophagy [GO:0006914]; ER to Golgi vesicle-mediated transport [GO:0006888]; Golgi ribbon formation [GO:0090161]; Golgi to vacuole transport [GO:0006896]; intra-Golgi vesicle-mediated transport [GO:0006891]; protein targeting to vacuole [GO:0006623]; retrograde transport, endosome to Golgi [GO:0042147]; vesicle fusion with Golgi apparatus [GO:0048280]; voluntary musculoskeletal movement [GO:00508…	71.1667	10.7595	54.25	4.34933
XM_001234037.4	WBSCR27	Williams Beuren syndrome chromosome region 27	1.30739	Uncharacterized	Uncharacterized	Uncharacterized	85.6667	9.33095	112	9.59166
NM_001012554.2	WWP1	WW domain containing E3 ubiquitin protein ligase 1	-1.3239	Enzyme	Cytoplasm	negative regulation of transcription, DNA-templated [GO:0045892]; positive regulation of protein catabolic process [GO:0045732]; proteasome-mediated ubiquitin-dependent protein catabolic process [GO:0043161]; protein polyubiquitination [GO:0000209]; protein ubiquitination [GO:0016567]; ubiquitin-dependent protein catabolic process [GO:0006511]	7436.67	601.443	5617.25	215.046
NM_001290134.1	XPO1	Exportin 1	-1.23243	Transporter	Nucleus	protein localization to nucleus [GO:0034504]; regulation of centrosome duplication [GO:0010824]; regulation of protein catabolic process [GO:0042176]; regulation of protein export from nucleus [GO:0046825]; ribosomal large subunit export from nucleus [GO:0000055]; ribosomal small subunit export from nucleus [GO:0000056]	3147	110.024	2553.5	83.8312
XR_001466309.1	YIPF7	Yip1 domain family, member 7 (misc_RNA)	-1.67422	Other	Other	Uncharacterized	129.333	36.9306	77.25	10.7199
NM_001044642.1	ZBTB48	Zinc finger and BTB domain containing 48	1.24853	Transcription regulator	Nucleus	positive regulation of transcription, DNA-templated [GO:0045893]; telomere maintenance via telomere lengthening [GO:0010833]	820.167	85.9009	1024	93.2631
XM_015279239.1	ZDHHC20	Zinc finger, DHHC-type containing 20	-1.48006	Enzyme	Plasma membrane	peptidyl-L-cysteine S-palmitoylation [GO:0018230]; protein palmitoylation [GO:0018345]; protein targeting to membrane [GO:0006612]	77.3333	17.8512	52.25	5.90903
XM_004948611.2	ZNF385C	Zinc finger protein 385C	1.5031	Other	Other	Uncharacterized	80.6667	21.3791	121.25	12.2848
XM_015273045.1	ZNF853	Zinc finger protein 853	1.3909	Other	Other	Uncharacterized	2612.33	132.784	3633.5	746.348
XM_004938275.2	ZPLD1	Zona pellucida-like domain containing 1	-1.43119	Other	Other	Uncharacterized	78	11.3314	54.5	9.98332
